# Supplementary material
Source: PubMed Central journal article supplement (PMC8864491)
Supplement: MD-013-D1MD00285F-s001.pdf [file MD-013-D1MD00285F-s001.pdf]

## Supporting Information

### Design, Synthesis, and Biological Evaluation of C<sub>6</sub>-Difluoromethylenated Epoxymorphinan Mu Opioid Receptor Antagonists

Andrew J. Kassick,<sup>a,b</sup> Anny Treat,<sup>c</sup> Nestor Tomycz,<sup>b</sup> Michael G. Feasel,<sup>d</sup> Benedict J. Kolber,<sup>c</sup> and Saadyah Averick<sup>a,b\*</sup>

<sup>a</sup> *Neuroscience Disruptive Research Lab, Allegheny Health Network Research Institute, Allegheny General Hospital, Pittsburgh, PA 15212, USA.*

<sup>b</sup> *Neuroscience Institute, Allegheny Health Network, Allegheny General Hospital, Pittsburgh, PA 15212, USA.*

<sup>c</sup> *Department of Neuroscience and Center for Advanced Pain Studies, University of Texas at Dallas, Richardson, TX 75080, USA.*

<sup>d</sup> *Department of Toxicology, Edgewood Chemical Biological Center, Aberdeen Proving Ground, MD 15217, USA.*

#### Corresponding Author

\* E-mail: Saadyah.Averick@ahn.org; Tel: +1-412-359-4943

**Synthesis and characterization of (6-difluoromethylene)naloxone (5)**

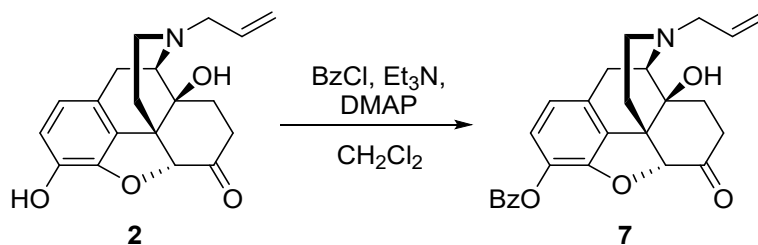

**3-Benzoyl-naloxone (7).** To a 0 °C solution of naloxone (**2**, 0.300 g, 0.916 mmol) in 7 mL of anhydrous CH<sub>2</sub>Cl<sub>2</sub> was added triethylamine (0.383 mL, 2.75 mmol) followed by a solution of benzoyl chloride (0.127 mL, 1.10 mmol) in 1 mL of CH<sub>2</sub>Cl<sub>2</sub> slowly dropwise via syringe. The reaction was then warmed to ambient temperature and maintained for 3.5 h. TLC analysis (2% MeOH/CH<sub>2</sub>Cl<sub>2</sub>) showed the consumption of starting material. The reaction mixture was diluted with CH<sub>2</sub>Cl<sub>2</sub> (60 mL) and washed with saturated aqueous NaHCO<sub>3</sub> and brine. The organics were dried over anhydrous MgSO<sub>4</sub>, filtered, and concentrated. Purification by flash chromatography on SiO<sub>2</sub> (42 g, 2% MeOH/CH<sub>2</sub>Cl<sub>2</sub>) afforded 377 mg (95%) of a white solid. <sup>1</sup>H NMR (500 MHz, DMSO-*d*<sub>6</sub>): δ 8.14-8.09 (m, 2H), 7.80-7.74 (m, 1H), 7.66-7.60 (m, 2H), 7.01 (d, *J* = 8.2 Hz, 1H), 6.80 (d, *J* = 8.2 Hz, 1H), 5.93-5.82 (m, 1H), 5.26 (dd, *J* = 1.7, 17.2 Hz, 1H), 5.19-5.14 (m, 1H), 5.09 (d, *J* = 1.2 Hz, 1H), 4.92 (s, 1H), 3.22-3.11 (m, 3H), 3.01 (d, *J* = 5.6 Hz, 1H), 2.92 (ddd, *J* = 5.2, 14.4, 14.4 Hz, 1H), 2.62 (dd, *J* = 5.8, 19.0 Hz, 1H), 2.57 (dd, *J* = 4.7, 12.0 Hz, 1H), 2.40 (ddd, *J* = 5.2, 12.6, 12.6 Hz, 1H), 2.11 (ddd, *J* = 3.0, 3.0, 14.3 Hz, 1H), 2.00 (ddd, *J* = 3.6, 12.0, 12.0 Hz, 1H), 1.79 (ddd, *J* = 3.0, 4.9, 13.6 Hz, 1H), 1.47 (ddd, *J* = 2.7, 14.2, 14.2 Hz, 1H), 1.34 (dd, *J* = 2.7, 13.0 Hz, 1H). <sup>13</sup>C NMR (125 MHz, DMSO-*d*<sub>6</sub>): δ 207.6, 163.5, 147.4, 136.0, 134.2, 131.7, 131.4, 130.9, 129.8 (2C), 129.1 (2C), 128.4, 122.6, 119.3, 117.6, 90.3, 69.7, 61.4, 57.0, 50.3, 42.9, 35.7, 31.2, 29.9, 22.8. MS (ESI): *m/z* calcd for C<sub>26</sub>H<sub>25</sub>NO<sub>5</sub> 431.17, found 414.19 [M+H-H<sub>2</sub>O]<sup>+</sup>, 432.22 [M+H]<sup>+</sup>, 454.23 [M+Na]<sup>+</sup>.

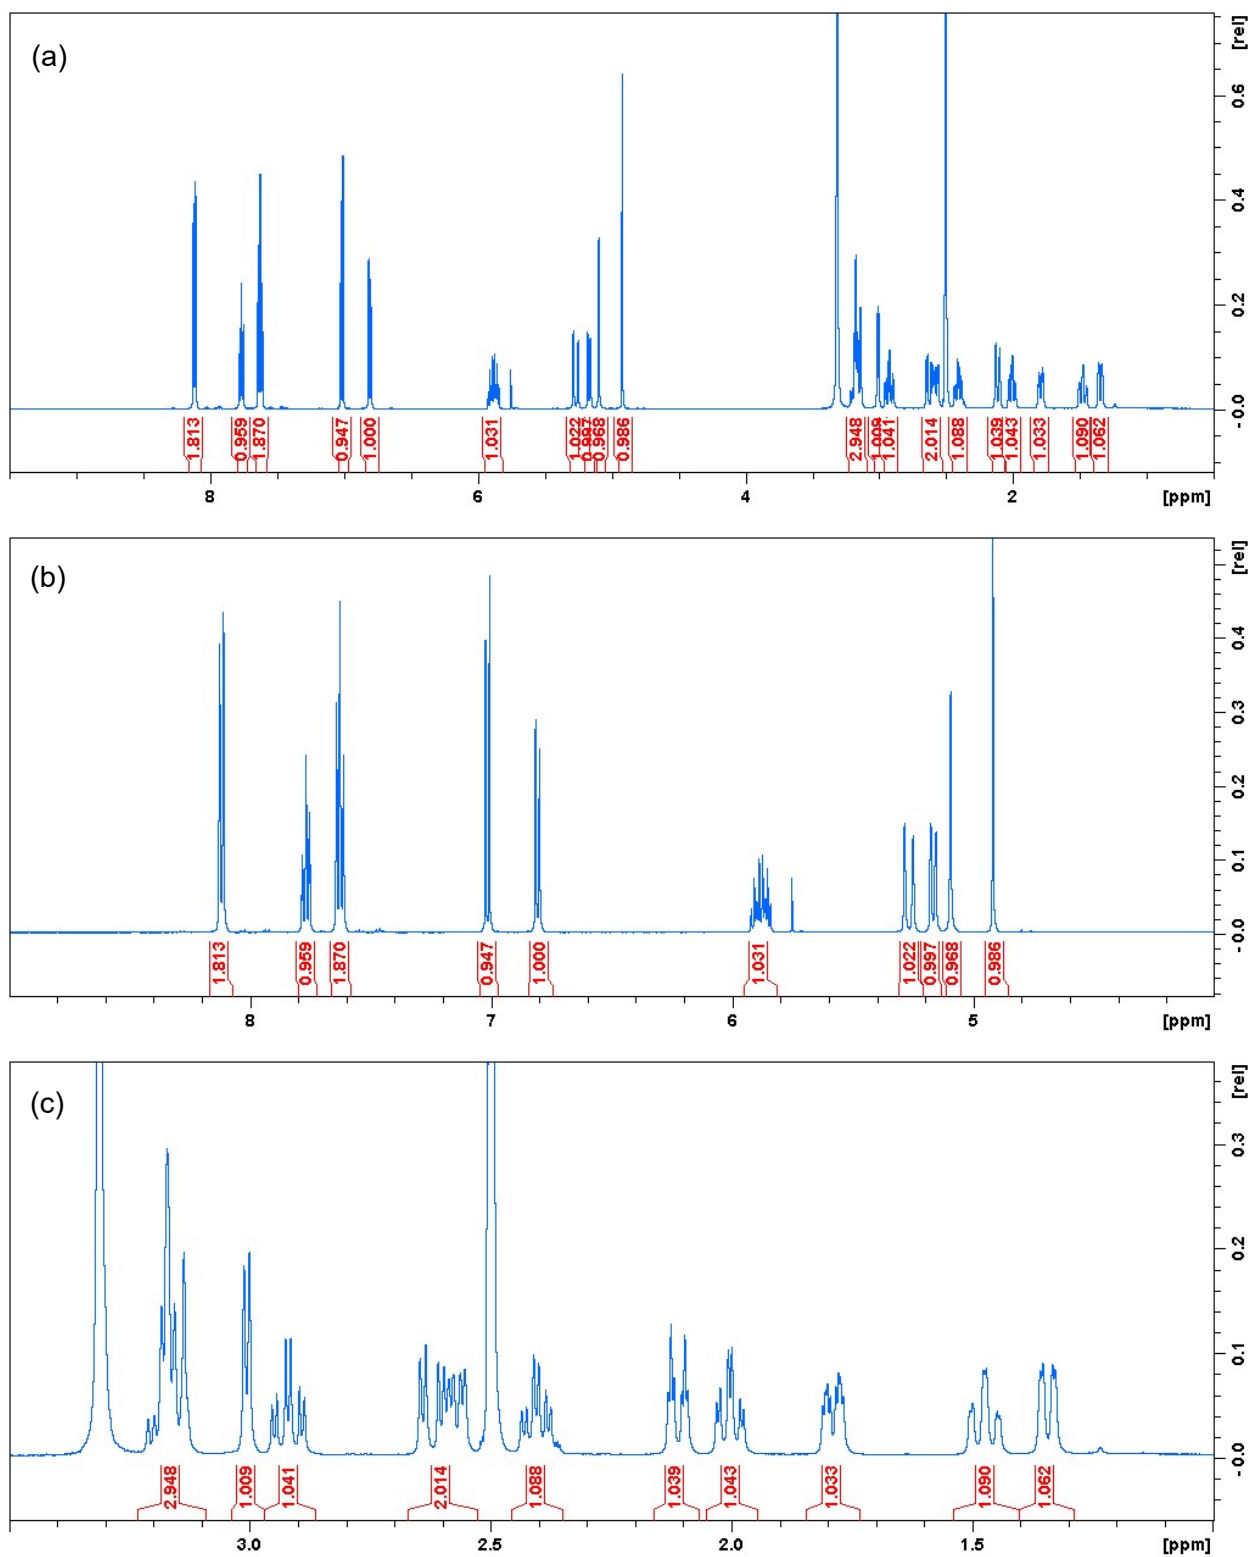

**Figure S1.** (a) <sup>1</sup>H NMR spectrum of 3-benzoyl-naloxone **7** in *d*<sub>6</sub>-DMSO (b) Expanded downfield region (c) Expanded upfield region

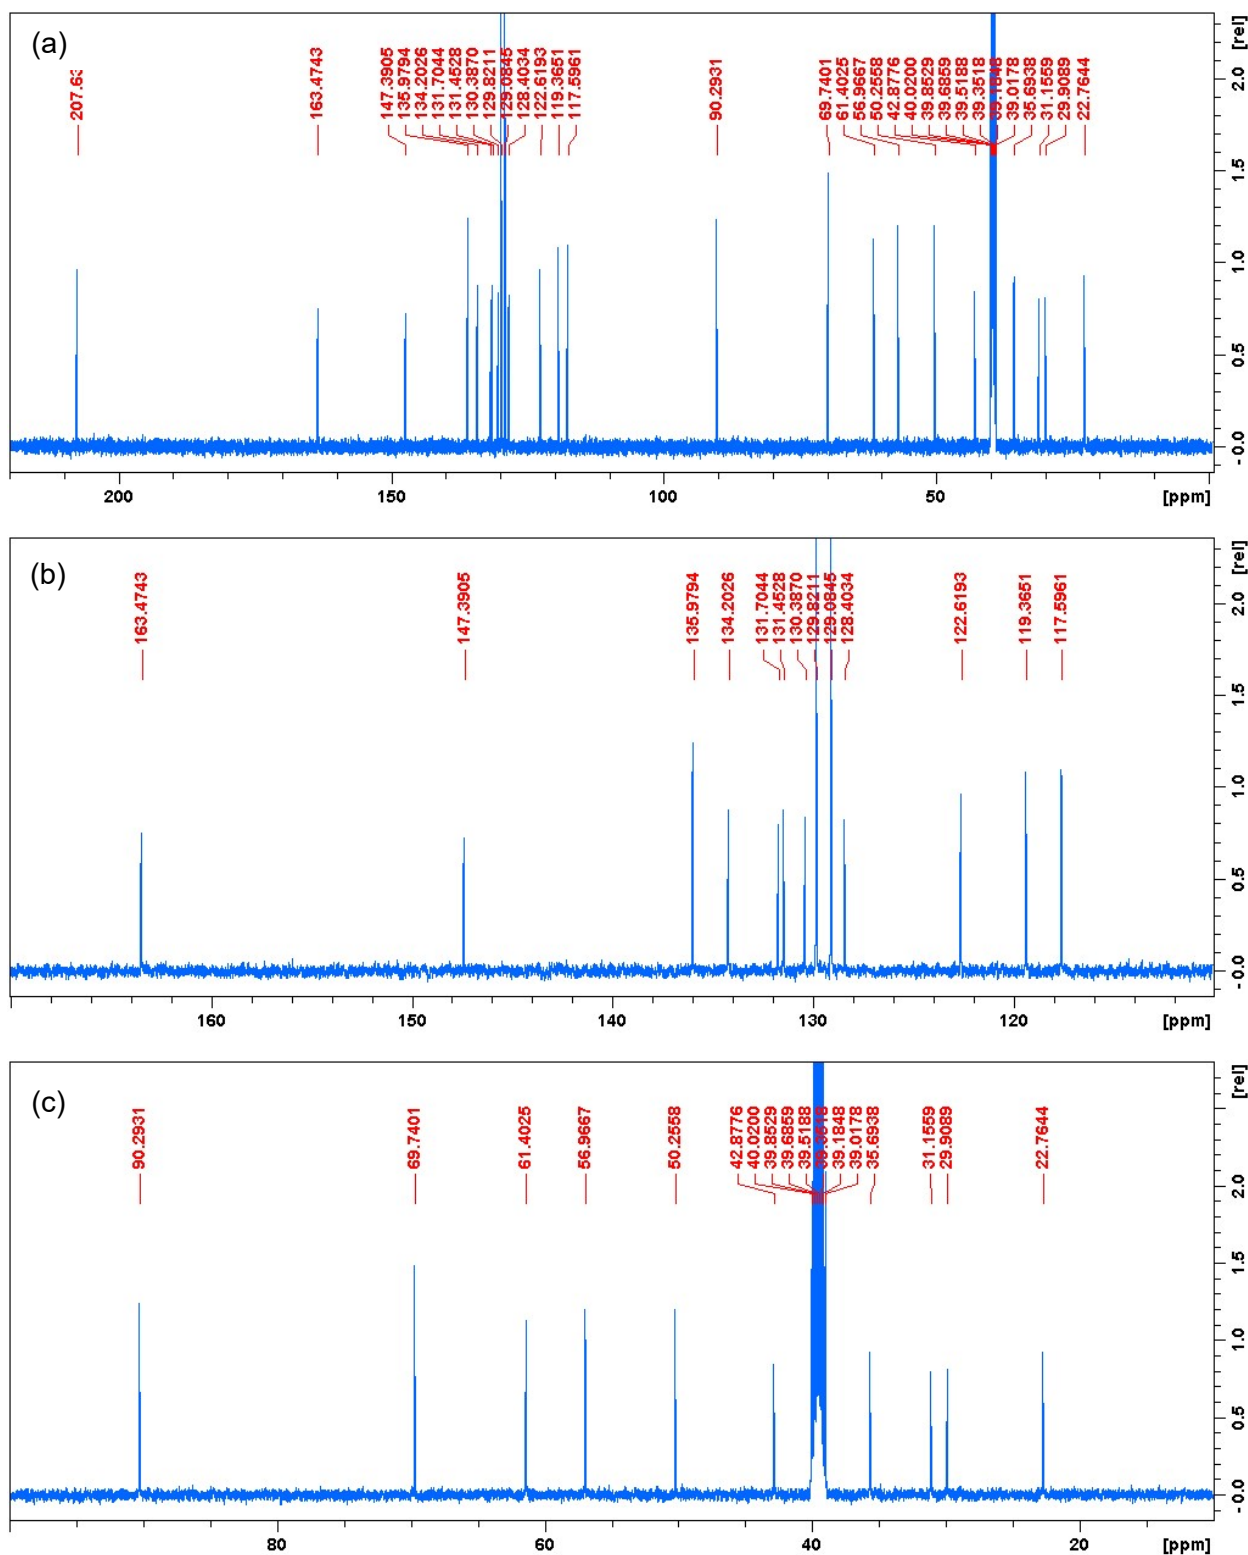

**Figure S2.** (a) <sup>13</sup>C NMR spectrum of 3-benzoyl-naloxone **7** in *d*<sub>6</sub>-DMSO (b) Expanded downfield region (c) Expanded upfield region

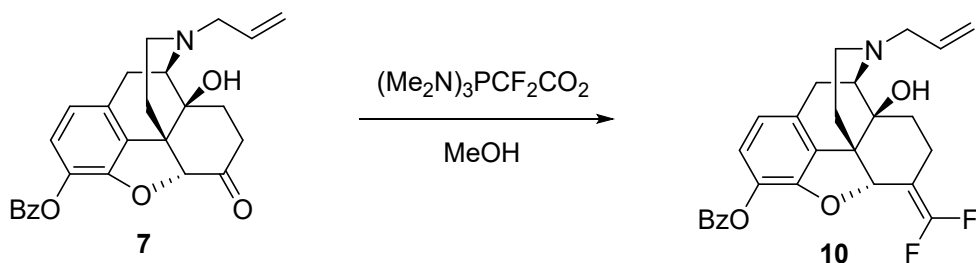

**3-Benzoyl-(6-difluoromethylene)naloxone (10).** An oven dried microwave vial was charged with ketone **7** (0.200 g, 0.464 mmol) and phosphonium salt **9** (0.358 g, 1.39 mmol). The contents of the vial were purged with N<sub>2</sub> for 20 min, then anhydrous DMF (2.5 mL) was added under N<sub>2</sub>. The slightly turbid reaction mixture was heated at 120 °C for 70 min. LC-MS analysis showed the starting material was mostly consumed. The reaction was allowed to cool to ambient temperature then poured into 25 mL of H<sub>2</sub>O. This mixture was extracted with EtOAc (3 x 20 mL). The combined organics were washed with H<sub>2</sub>O (2 x 20 mL) followed by brine then dried over anhydrous MgSO<sub>4</sub>, filtered, and concentrated. Purification by flash chromatography on SiO<sub>2</sub> (40 g, 0.5% MeOH/CH<sub>2</sub>Cl<sub>2</sub>) afforded 25 mg (12%) of the desired product as a white solid. <sup>1</sup>H NMR (500 MHz, DMSO-*d*<sub>6</sub>): δ 8.12-8.07 (m, 2H), 7.78-7.72 (m, 1H), 7.64-7.57 (m, 2H), 7.01 (d, *J* = 8.2 Hz, 1H), 6.78 (d, *J* = 8.2 Hz, 1H), 5.90-5.80 (m, 1H), 5.25 (*J* = 17.8 Hz, 1H), 5.22 (s, 1H), 5.15 (d, *J* = 9.9 Hz, 1H), 4.75 (s, 1H), 3.22-3.08 (m, 3H), 2.91 (d, *J* = 5.6 Hz, 1H), 2.68-2.60 (m, 1H), 2.60-2.52 (m, 1H), 2.35-2.26 (m, 1H), 2.23 (ddd, *J* = 4.8, 12.4, 12.4 Hz, 1H), 2.16-2.07 (m, 1H), 2.02-1.92 (m, 1H), 1.55-1.45 (m, 1H), 1.42 (d, *J* = 12.4 Hz, 1H), 1.23 (ddd, *J* = 7.0, 10.8, 14.1 Hz, 1H). <sup>13</sup>C NMR (125 MHz, DMSO-*d*<sub>6</sub>): δ 163.7, 152.8 (dd, *J* = 286, 293 Hz), 147.3, 136.0, 134.1, 132.2, 131.7, 131.6, 129.8 (2C), 129.1 (2C), 128.5, 122.6, 119.1, 117.5, 86.5 (dd, *J* = 11.7, 19.0 Hz), 85.0 (d, *J* = 4.7 Hz), 69.4, 61.7, 57.0, 46.6, 43.1, 30.9, 28.4, 22.9, 15.6. <sup>19</sup>F NMR (470 MHz, DMSO-*d*<sub>6</sub>): δ -85.9 (d, *J* = 40 Hz), -89.0 (d, *J* = 40 Hz). MS (ESI): *m/z* calcd for C<sub>27</sub>H<sub>25</sub>F<sub>2</sub>NO<sub>4</sub> 465.18, found 448.26 [M+H-H<sub>2</sub>O]<sup>+</sup>, 466.26 [M+H]<sup>+</sup>, 488.27 [M+Na]<sup>+</sup>.

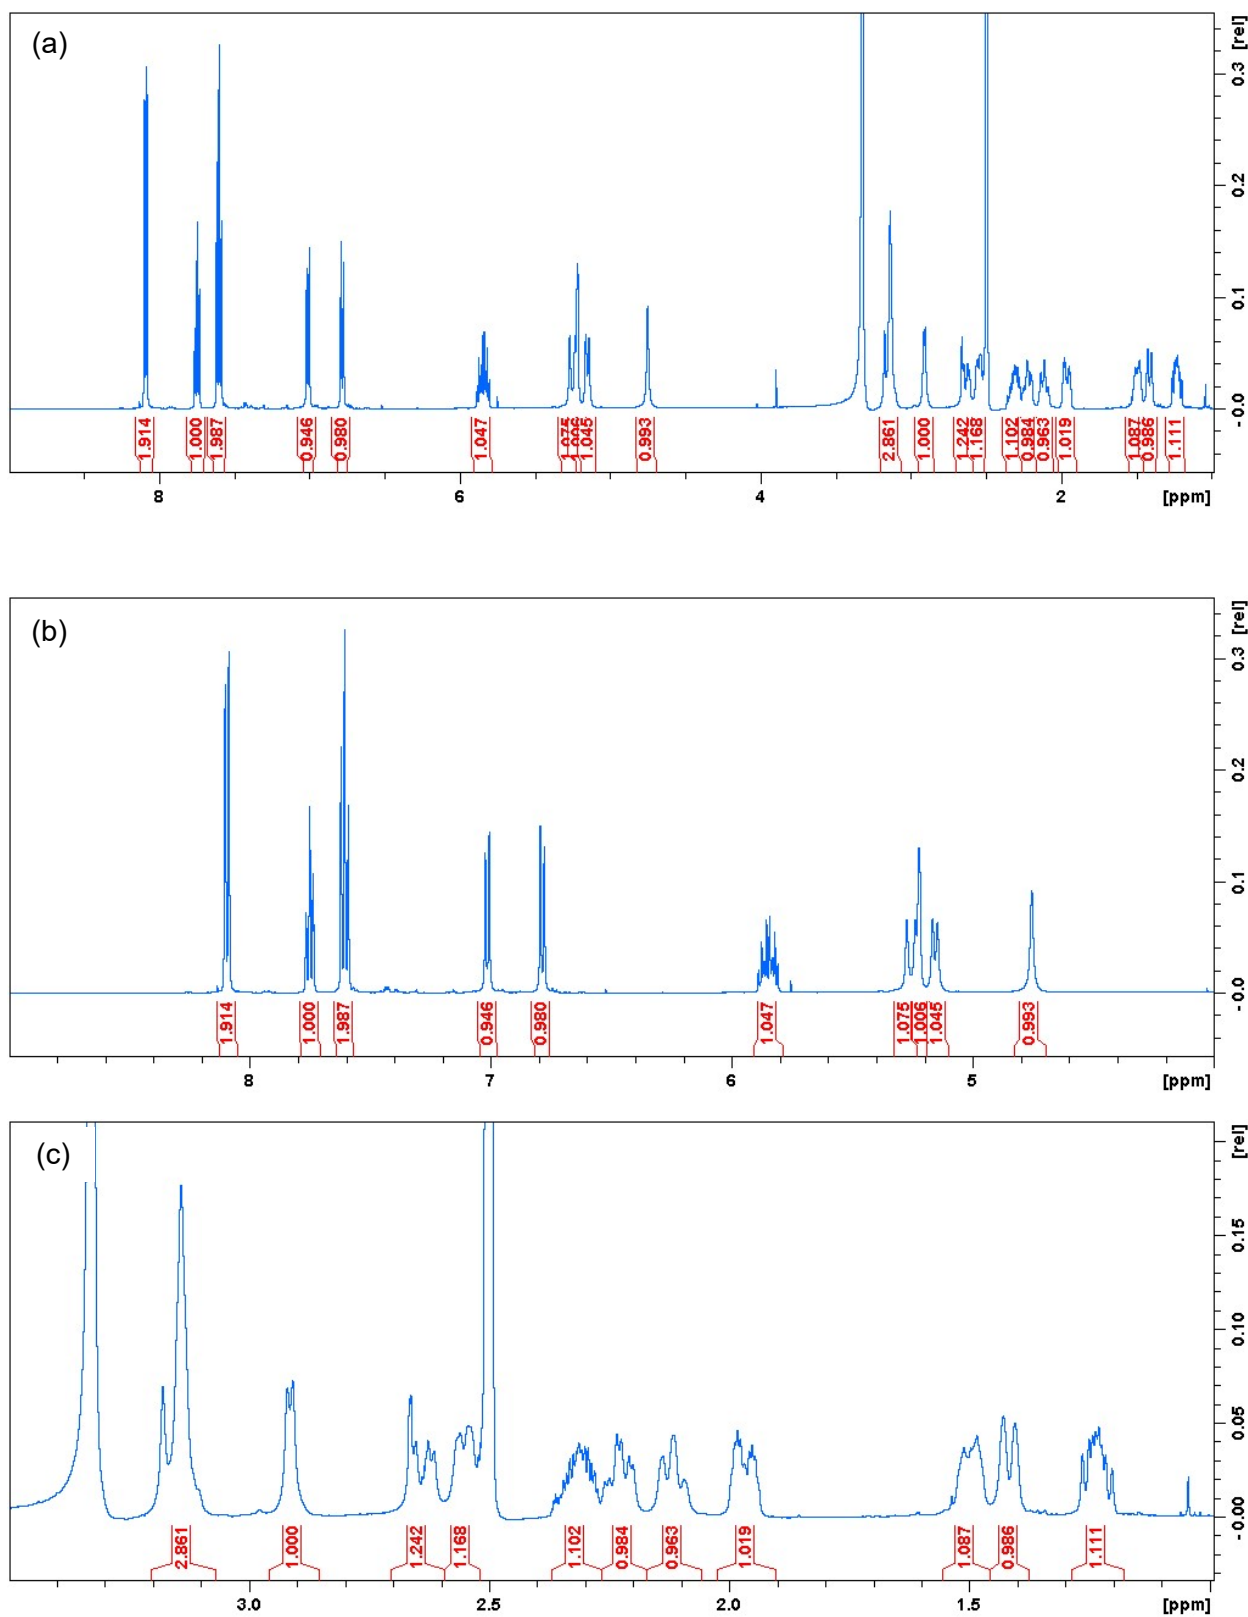

**Figure S3.** (a) <sup>1</sup>H NMR spectrum of 3-benzoyl-(6-difluoromethylene)nalone (**10**) in *d*<sub>6</sub>-DMSO (b) Expanded downfield region (c) Expanded upfield region

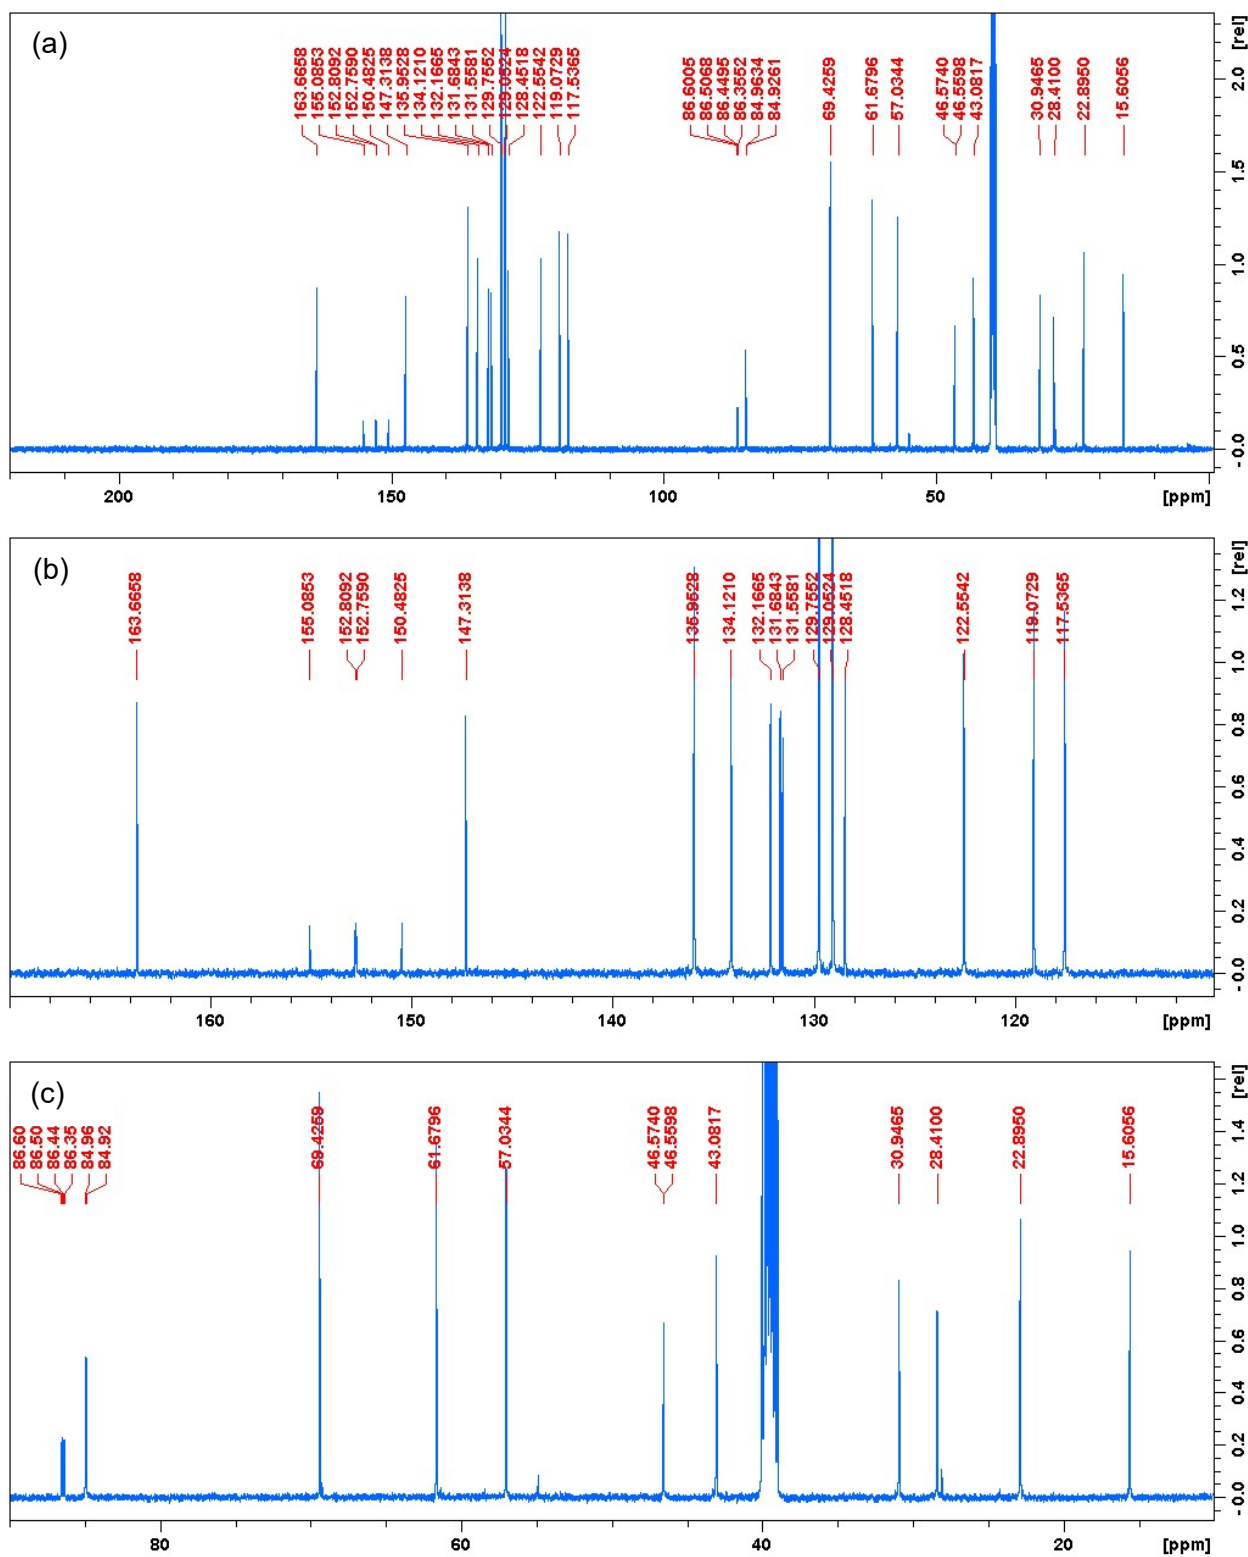

**Figure S4.** (a) <sup>13</sup>C NMR spectrum of 3-benzoyl-(6-difluoromethylene)naloxone (**10**) in *d*<sub>5</sub>-DMSO (b) Expanded downfield region (c) Expanded upfield region

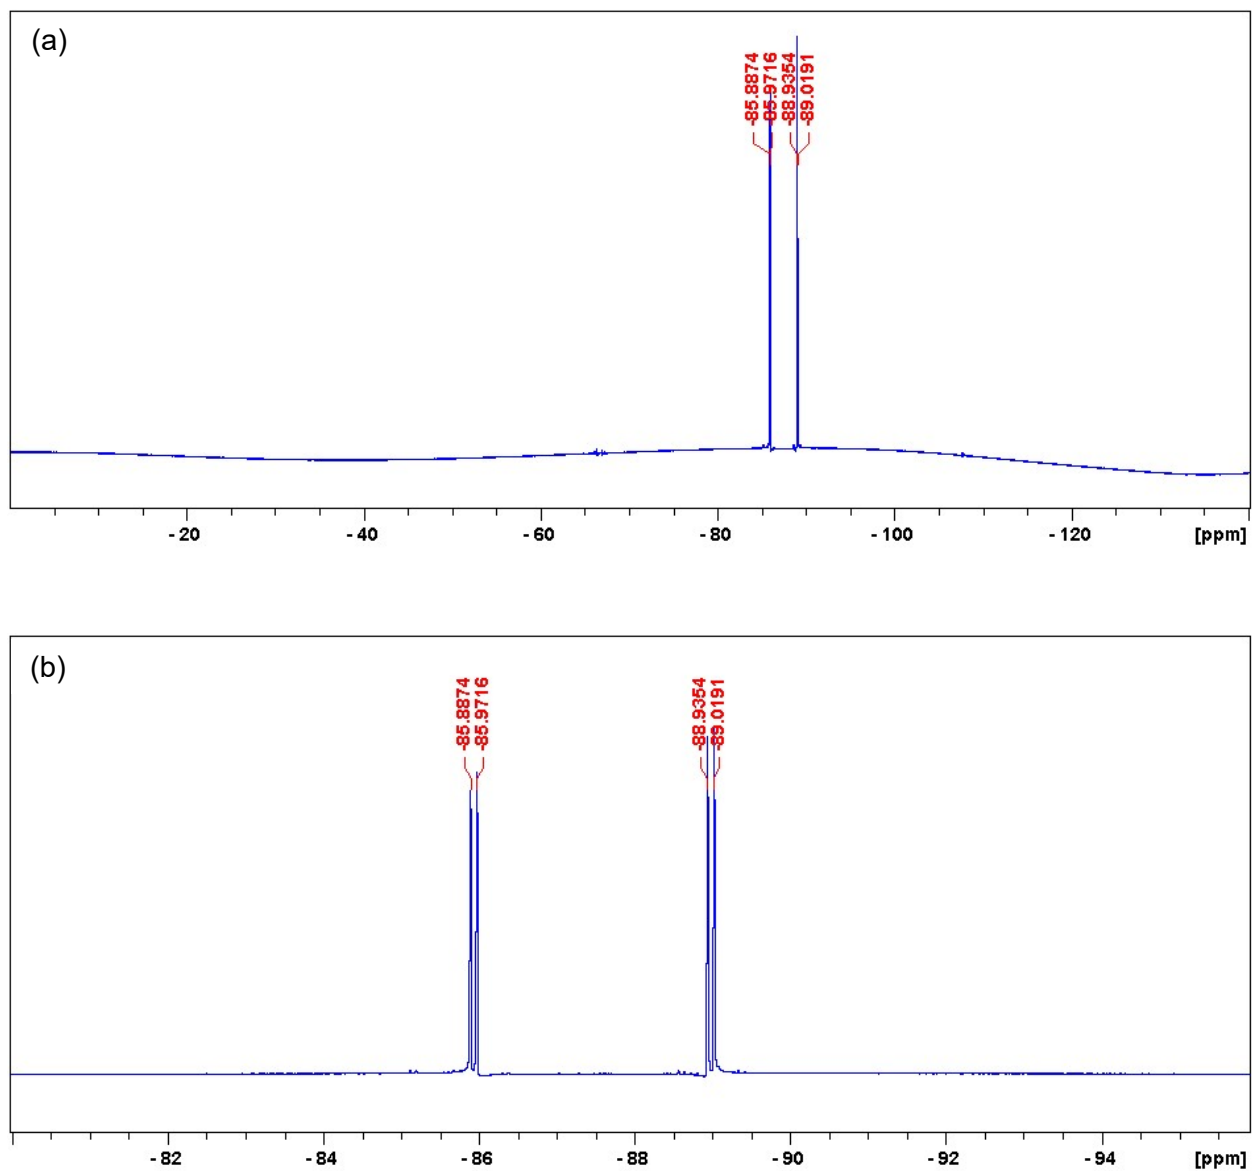

**Figure S5.** (a) <sup>19</sup>F NMR spectrum of 3-benzoyl-(6-difluoromethylene)naloxone (**10**) in *d*<sub>6</sub>-DMSO (b) Expansion for clarity.



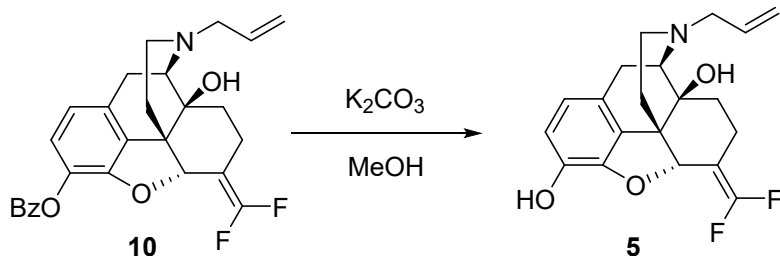

**(6-Difluoromethylene)naloxone (5).** To a solution of benzoate **10** (45 mg, 0.097 mmol) in 2 mL of MeOH was added  $\text{K}_2\text{CO}_3$  (20 mg, 0.145 mmol) in one portion. The mixture was maintained at ambient temperature for 3 h. LC-MS analysis showed the reaction was complete. The reaction was diluted with 30 mL of  $\text{CH}_2\text{Cl}_2$  and washed with saturated aqueous  $\text{NaHCO}_3$  (15 mL). The aqueous layer was further extracted with  $\text{CH}_2\text{Cl}_2$  (10 mL). The combined organics were washed with brine, dried over anhydrous  $\text{MgSO}_4$ , filtered, and concentrated. Purification by flash chromatography on  $\text{SiO}_2$  (12 g, 0.5% MeOH/ $\text{CH}_2\text{Cl}_2$ ) afforded 25 mg (71%) of the desired product as a white solid.  $^1\text{H}$  NMR (500 MHz,  $\text{DMSO}-d_6$ ):  $\delta$  9.03 (s, 1 H), 6.58 (d,  $J = 8.0$  Hz, 1H), 6.50 (d,  $J = 8.0$  Hz, 1H), 5.88-5.77 (m, 1H), 5.23 (dd,  $J = 1.7, 17.2$  Hz, 1H), 5.13 (dd,  $J = 1.7, 10.2$  Hz, 1H), 5.07 (d,  $J = 2.5$  Hz, 1H), 4.67 (s, 1H), 3.15-3.05 (m, 2H), 3.02 (d,  $J = 18$  Hz, 1H), 2.84 (d,  $J = 6.1$  Hz, 1H), 2.54-2.45 (m, 2H), 2.35-2.25 (m, 1H), 2.16 (ddd,  $J = 4.9, 12.5, 12.5$  Hz, 1H), 2.09 (ddd,  $J = 3.3, 12.4, 12.4$  Hz, 1H), 1.98-1.89 (m, 1H), 1.47-1.39 (m, 1H), 1.38-1.32 (m, 1H), 1.20 (ddd,  $J = 6.8, 10.8, 13.7$ , Hz 1H).  $^{13}\text{C}$  NMR (125 MHz,  $\text{DMSO}-d_6$ ):  $\delta$  153.4 (dd, 287, 293 Hz), 143.8, 139.6, 136.5, 130.9, 124.5, 119.1, 117.9, 117.5, 87.4 (dd,  $J = 12.2, 17.7$  Hz), 83.7 (d,  $J = 5.0$  Hz), 69.9, 62.4, 57.5, 46.8, 43.7, 31.8, 28.7, 22.9, 16.2.  $^{19}\text{F}$  NMR (470 MHz,  $\text{DMSO}-d_6$ ):  $\delta$  -86.3 (d,  $J = 40$  Hz), -89.3 (d,  $J = 40$  Hz). MS (ESI):  $m/z$  calcd for  $\text{C}_{20}\text{H}_{21}\text{F}_2\text{NO}_3$  361.15, found 344.00  $[\text{M}+\text{H}-\text{H}_2\text{O}]^+$ , 362.02  $[\text{M}+\text{H}]^+$ .

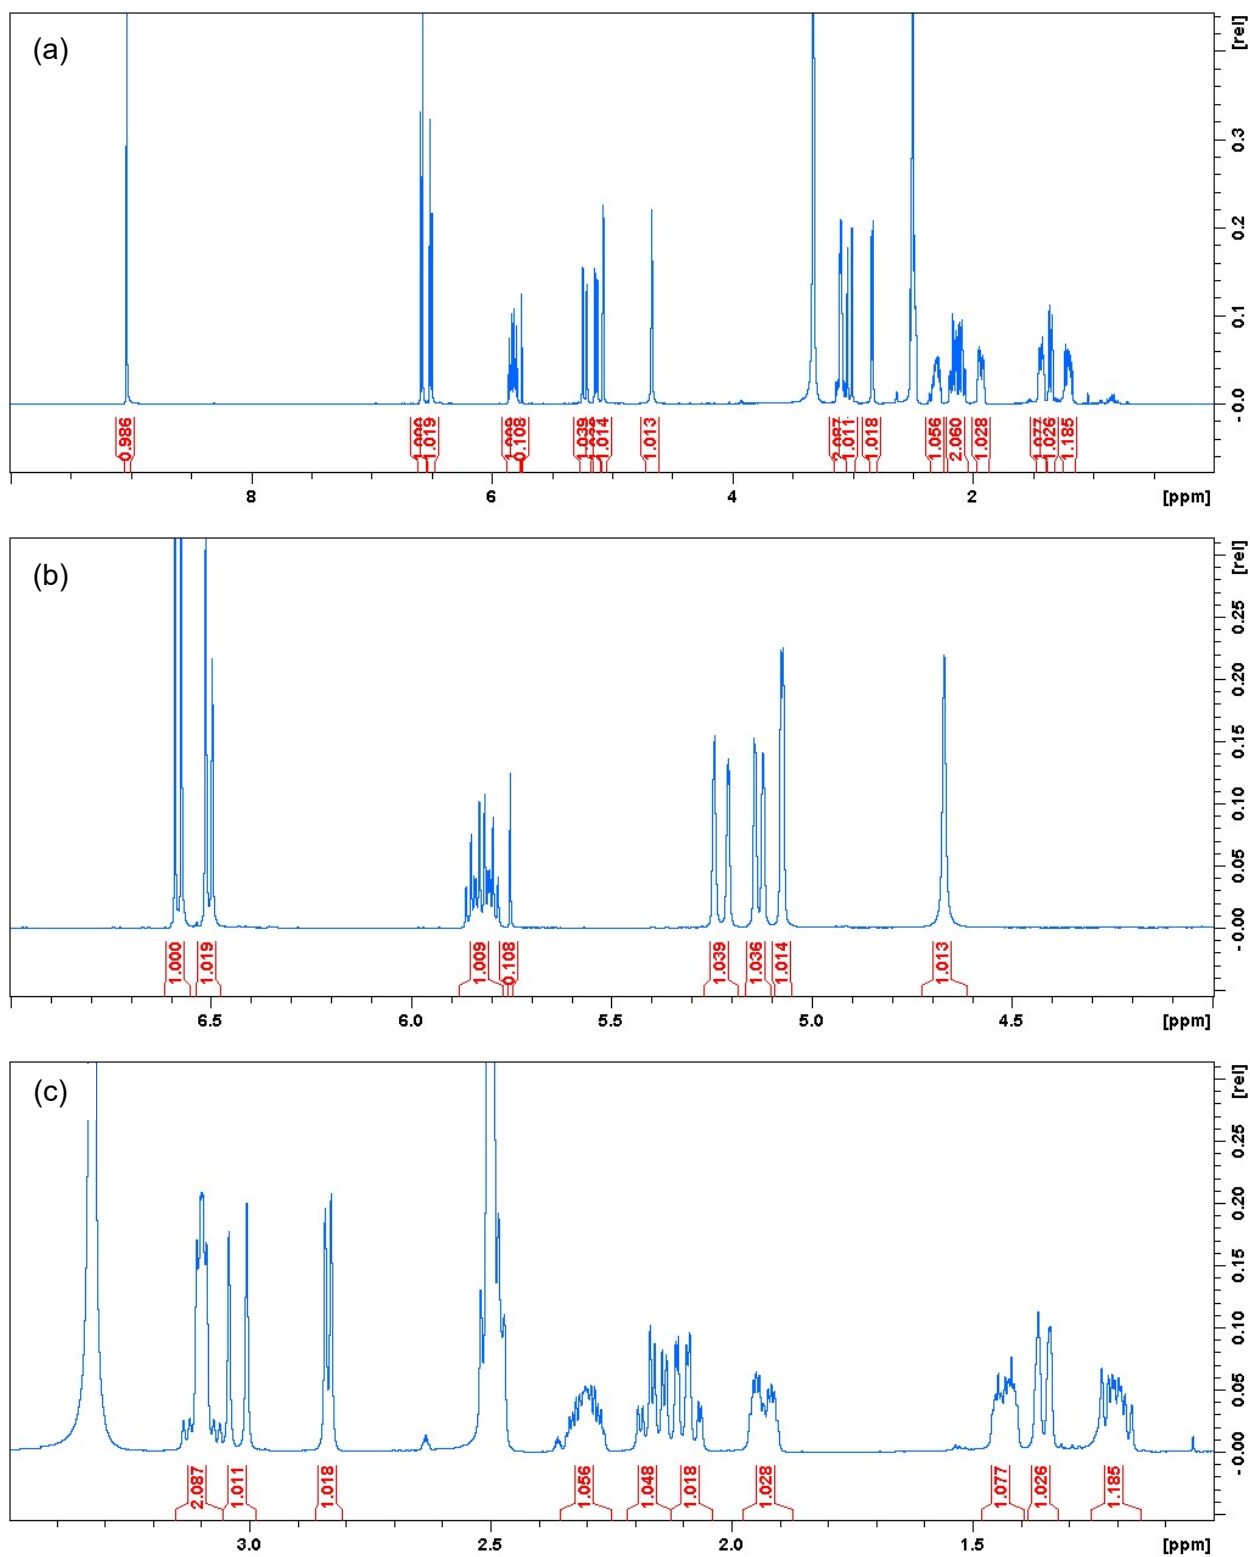

**Figure S6.** (a) <sup>1</sup>H NMR spectrum of (6-difluoromethylene)naloxone (**5**) in *d*<sub>6</sub>-DMSO (b) Expanded downfield region (c) Expanded upfield region

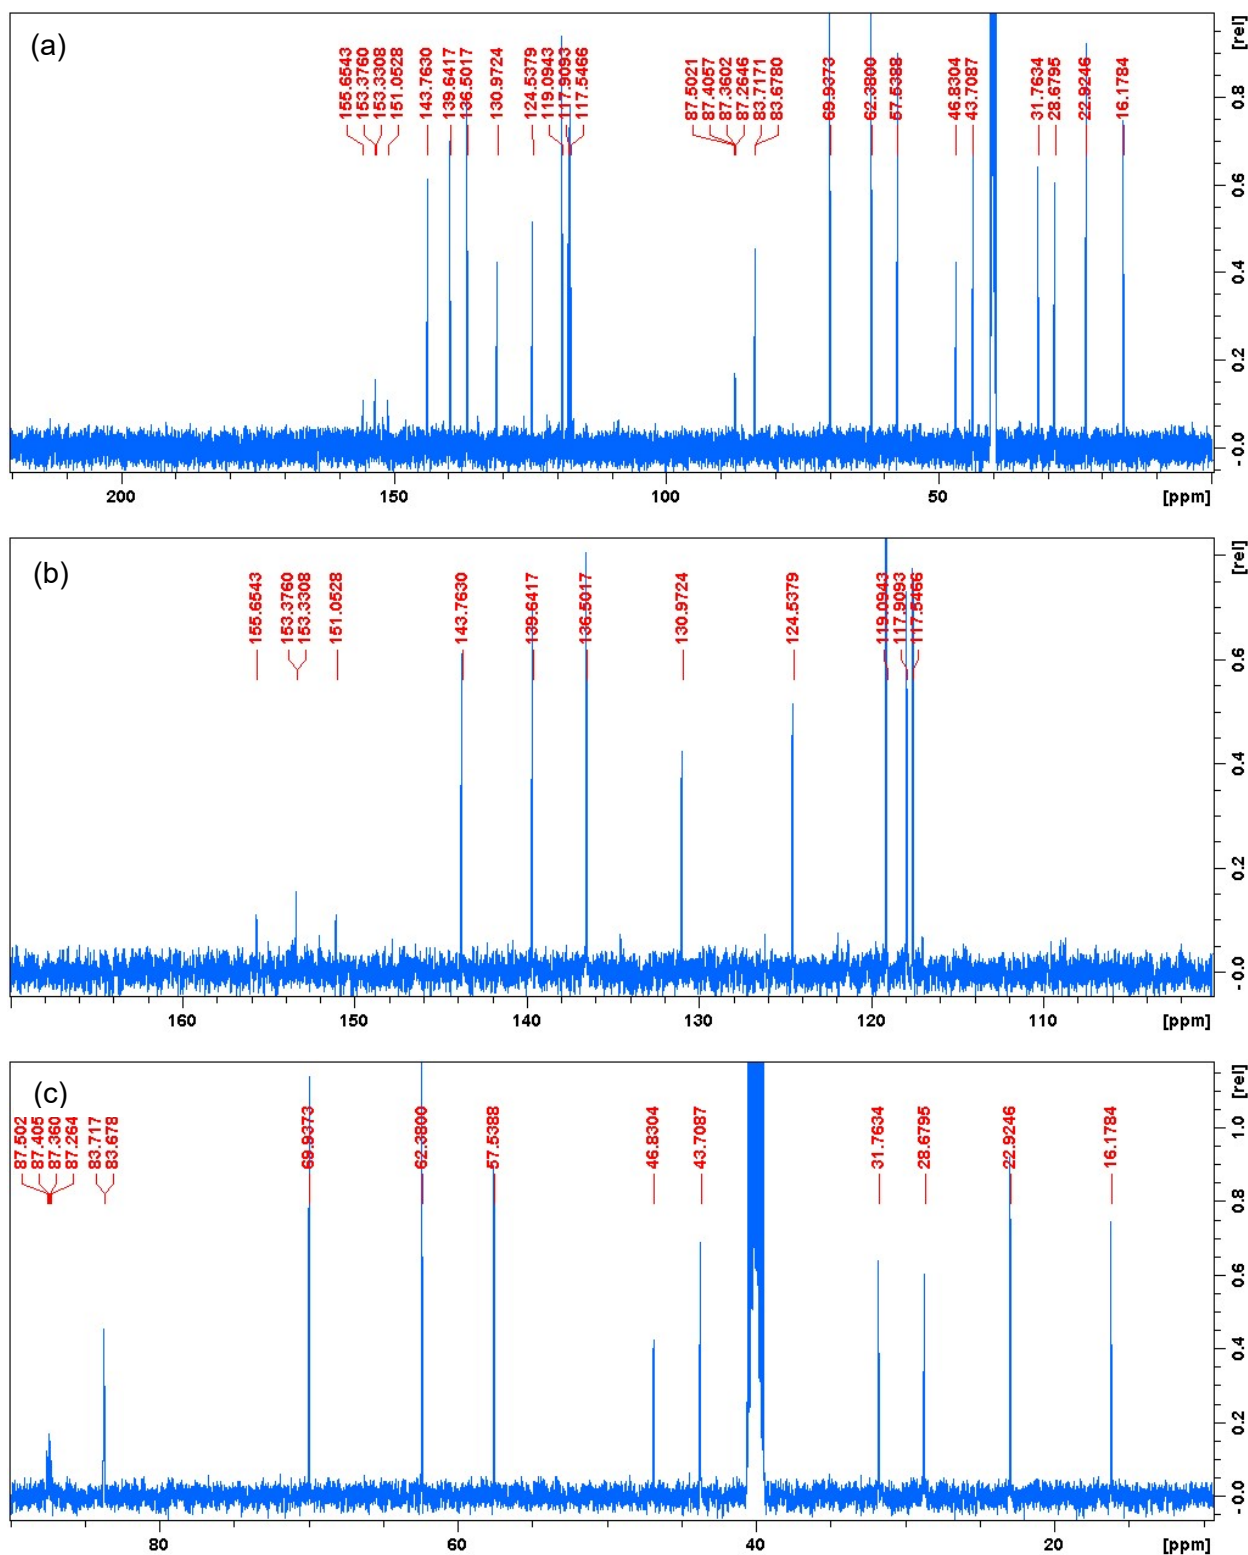

**Figure S7.** (a)  $^{13}\text{C}$  NMR spectrum of (6-difluoromethylene)naloxone (**5**) in  $d_6$ -DMSO (b) Expanded downfield region (c) Expanded upfield region

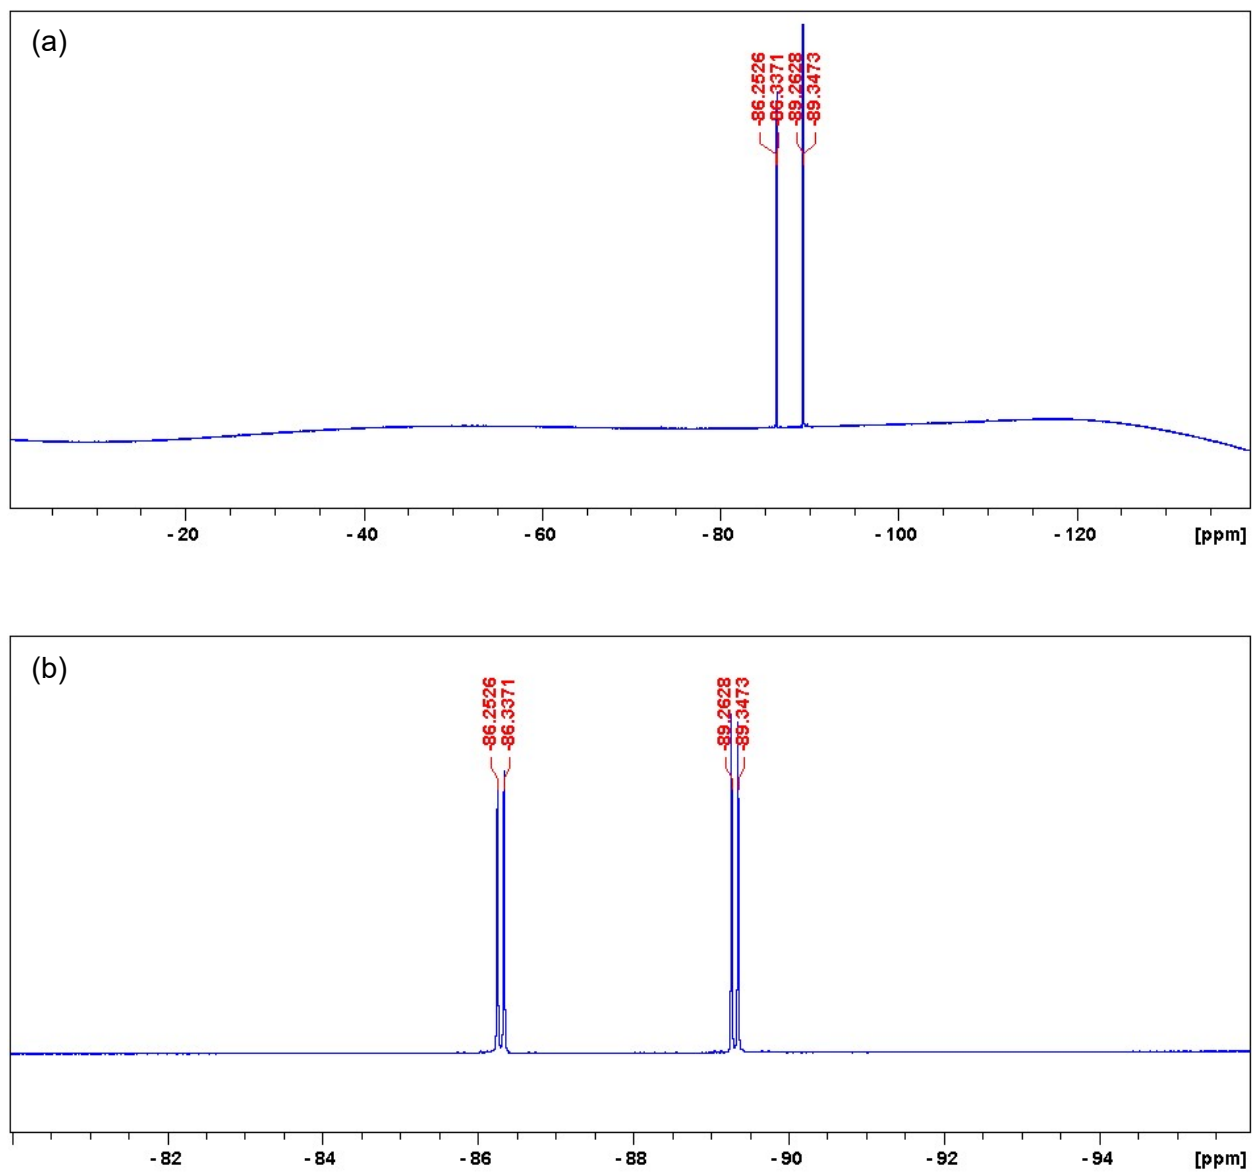

**Figure S8.** (a)  $^{19}\text{F}$  NMR spectrum of (6-difluoromethylene)naloxone (**5**) in  $d_6$ -DMSO (b) Expansion for clarity.

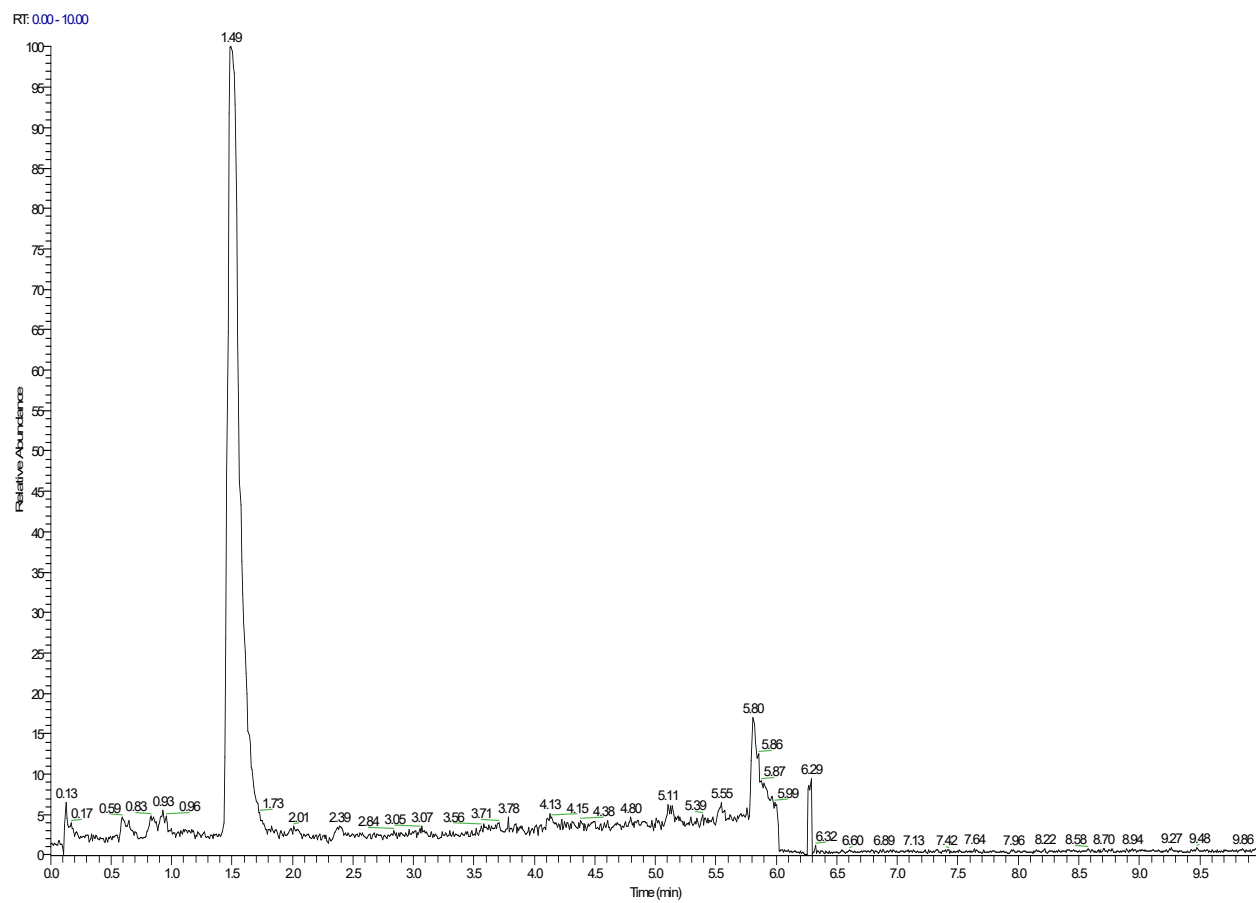

**Figure S9.** LC-MS chromatogram of (6-difluoromethylene)naloxone (**5**).

AK\_V\_29\_H2O2#171 RT: 1.50 A4 1 NL: 1.19E7  
T: +cESI QIMS[150.000-900.000]

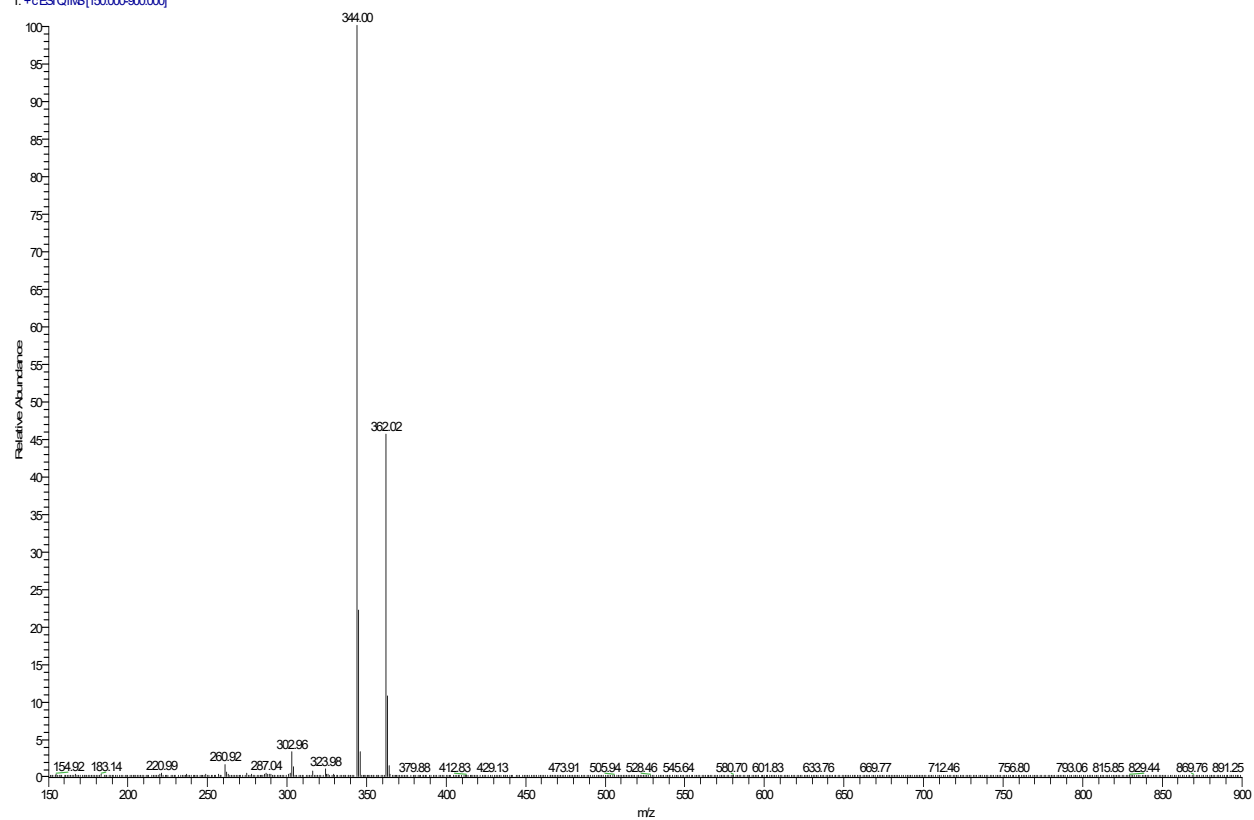

**Figure S10.** LC-MS mass spectrum of (6-difluoromethylene)naloxone (**5**).

### Synthesis and characterization of (6-difluoromethylene)naltrexone (6)

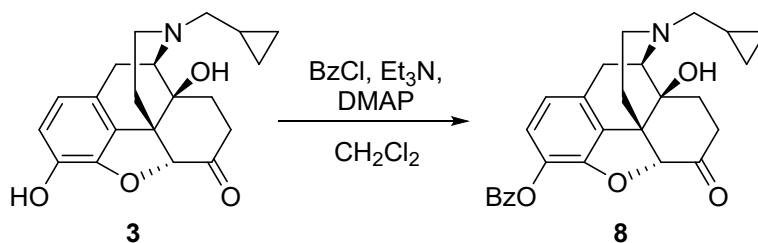

**3-Benzoyl-naltrexone (8).** To a 0 °C solution of naltrexone (**3**, 0.350 g, 1.03 mmol) in 8 mL of anhydrous CH<sub>2</sub>Cl<sub>2</sub> was added triethylamine (0.430 mL, 3.08 mmol) followed by a solution of benzoyl chloride (0.143 mL, 1.23 mmol) in 1 mL of CH<sub>2</sub>Cl<sub>2</sub> slowly dropwise via syringe. The reaction was warmed to ambient temperature and maintained for 3 h. TLC analysis (2% MeOH/CH<sub>2</sub>Cl<sub>2</sub>) showed the consumption of starting material. The reaction was diluted with CH<sub>2</sub>Cl<sub>2</sub> (70 mL) and washed with saturated aqueous NaHCO<sub>3</sub> and brine. The organics were dried over anhydrous MgSO<sub>4</sub>, filtered and concentrated. Purification by flash chromatography on SiO<sub>2</sub> (42 g, 2% MeOH/CH<sub>2</sub>Cl<sub>2</sub>) afforded 421 mg (92%) of a white solid. <sup>1</sup>H NMR (500 MHz, DMSO-*d*<sub>6</sub>): δ 8.14-8.09 (m, 2H), 7.79-7.74 (m, 1H), 7.66-7.59 (m, 2H), 7.00 (d, *J* = 8.2 Hz, 1H), 6.79 (d, *J* = 8.2 Hz, 1H), 5.17 (br s, 1H), 4.93 (s, 1H), 3.20 (d, *J* = 5.7 Hz, 1H), 3.11 (d, *J* = 19.0 Hz, 1H), 2.93 (ddd, *J* = 5.0, 14.3, 14.3 Hz, 1H), 2.70 (dd, *J* = 4.9, 12.0 Hz, 1H), 2.63 (dd, *J* = 6.0, 19.0 Hz, 1H), 2.46-2.34 (m, 3H), 2.12 (ddd, *J* = 3.0, 3.0, 14.2 Hz, 1H), 2.00 (ddd, *J* = 3.8, 12.0, 12.0 Hz, 1H), 1.81 (ddd, *J* = 3.0, 4.9, 13.5 Hz, 1H), 1.49 (ddd, *J* = 3.1, 14.2, 14.2 Hz, 1H), 1.35 (dd, *J* = 2.7, 12.8 Hz, 1H), 0.95-0.85 (m, 1H), 0.56-0.45 (m, 2H), 0.20-0.10 (m, 2H). <sup>13</sup>C NMR (125 MHz, DMSO-*d*<sub>6</sub>): δ 207.6, 163.5, 147.4, 134.2, 131.7, 131.5, 130.4, 129.8 (2C), 129.1 (2C), 128.4, 122.6, 119.4, 90.3, 69.6, 61.2, 58.4, 50.3, 43.1, 35.7, 31.2, 30.2, 22.6, 9.2, 3.7, 3.6. MS (ESI): *m/z* calcd for C<sub>27</sub>H<sub>27</sub>NO<sub>5</sub> 445.19, found 428.31 [M+H-H<sub>2</sub>O]<sup>+</sup>, 446.33 [M+H]<sup>+</sup>, 468.31 [M+Na]<sup>+</sup>.

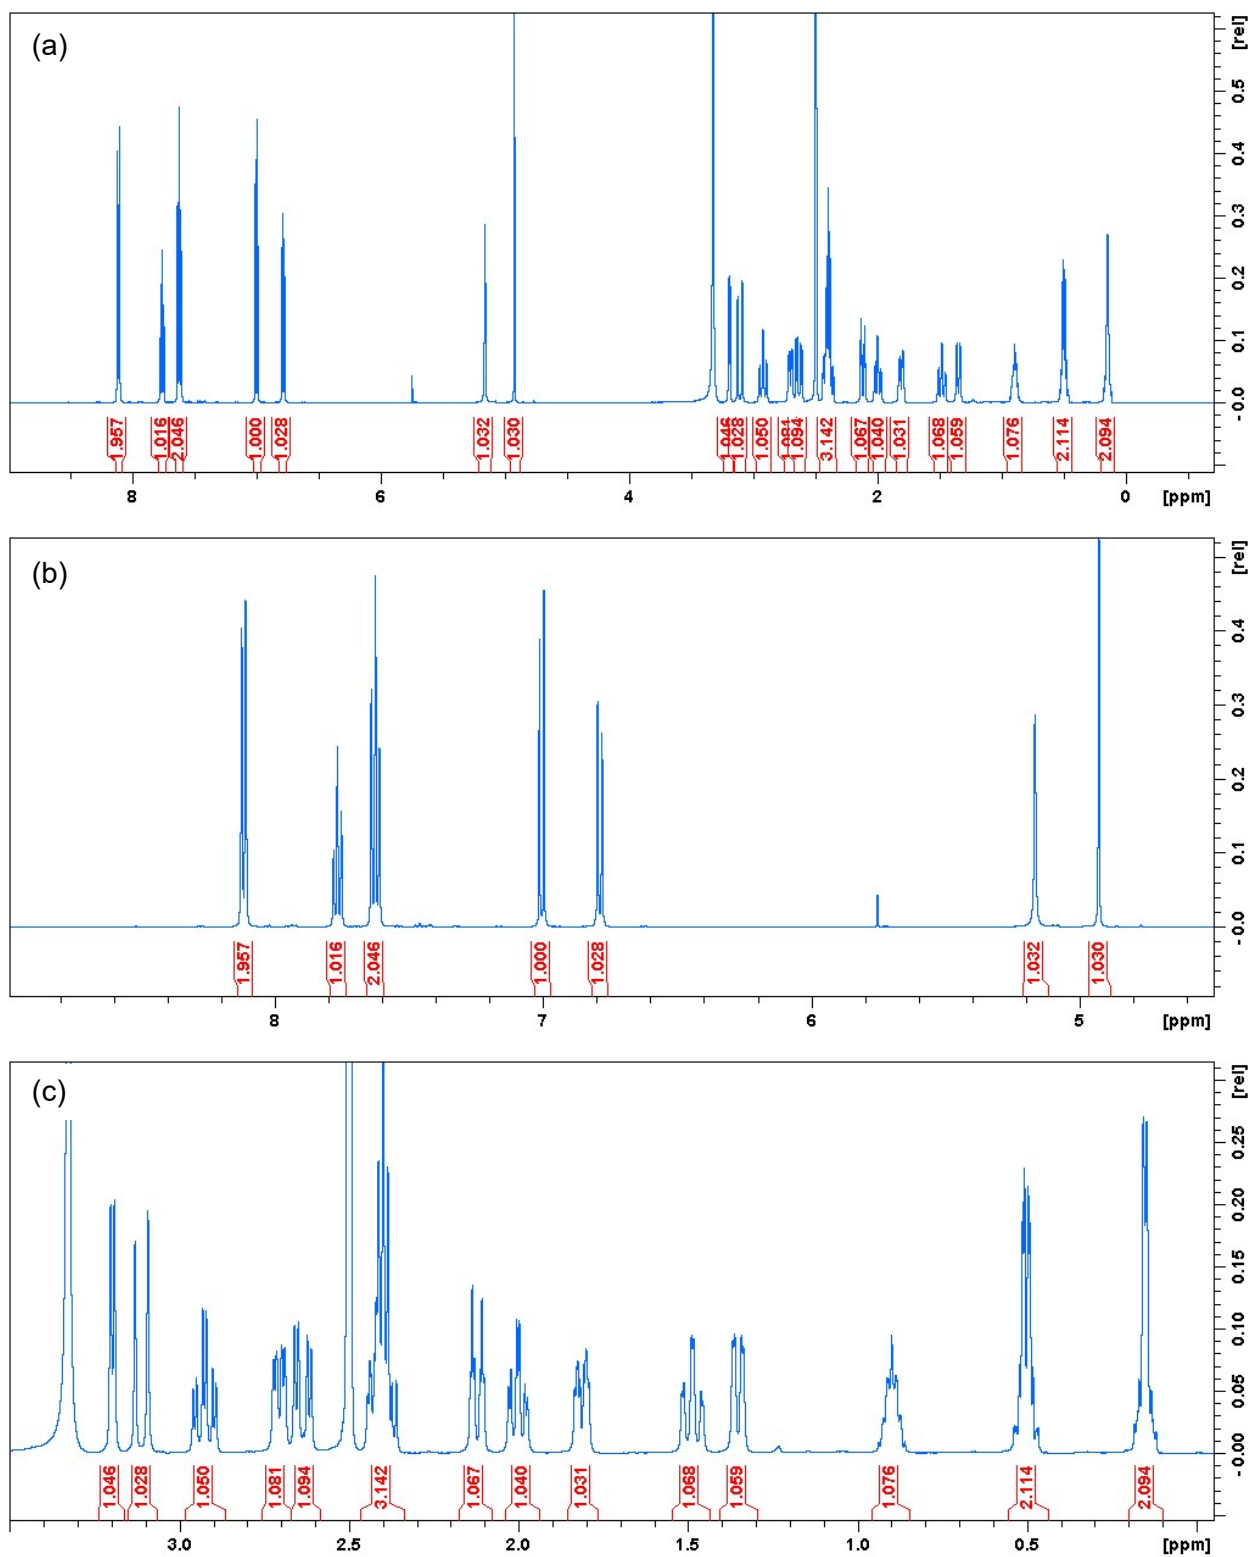

**Figure S11.** (a)  $^1\text{H}$  NMR spectrum of 3-benzoyl-naltrexone **8** in  $d_6$ -DMSO (b) Expanded downfield region (c) Expanded upfield region



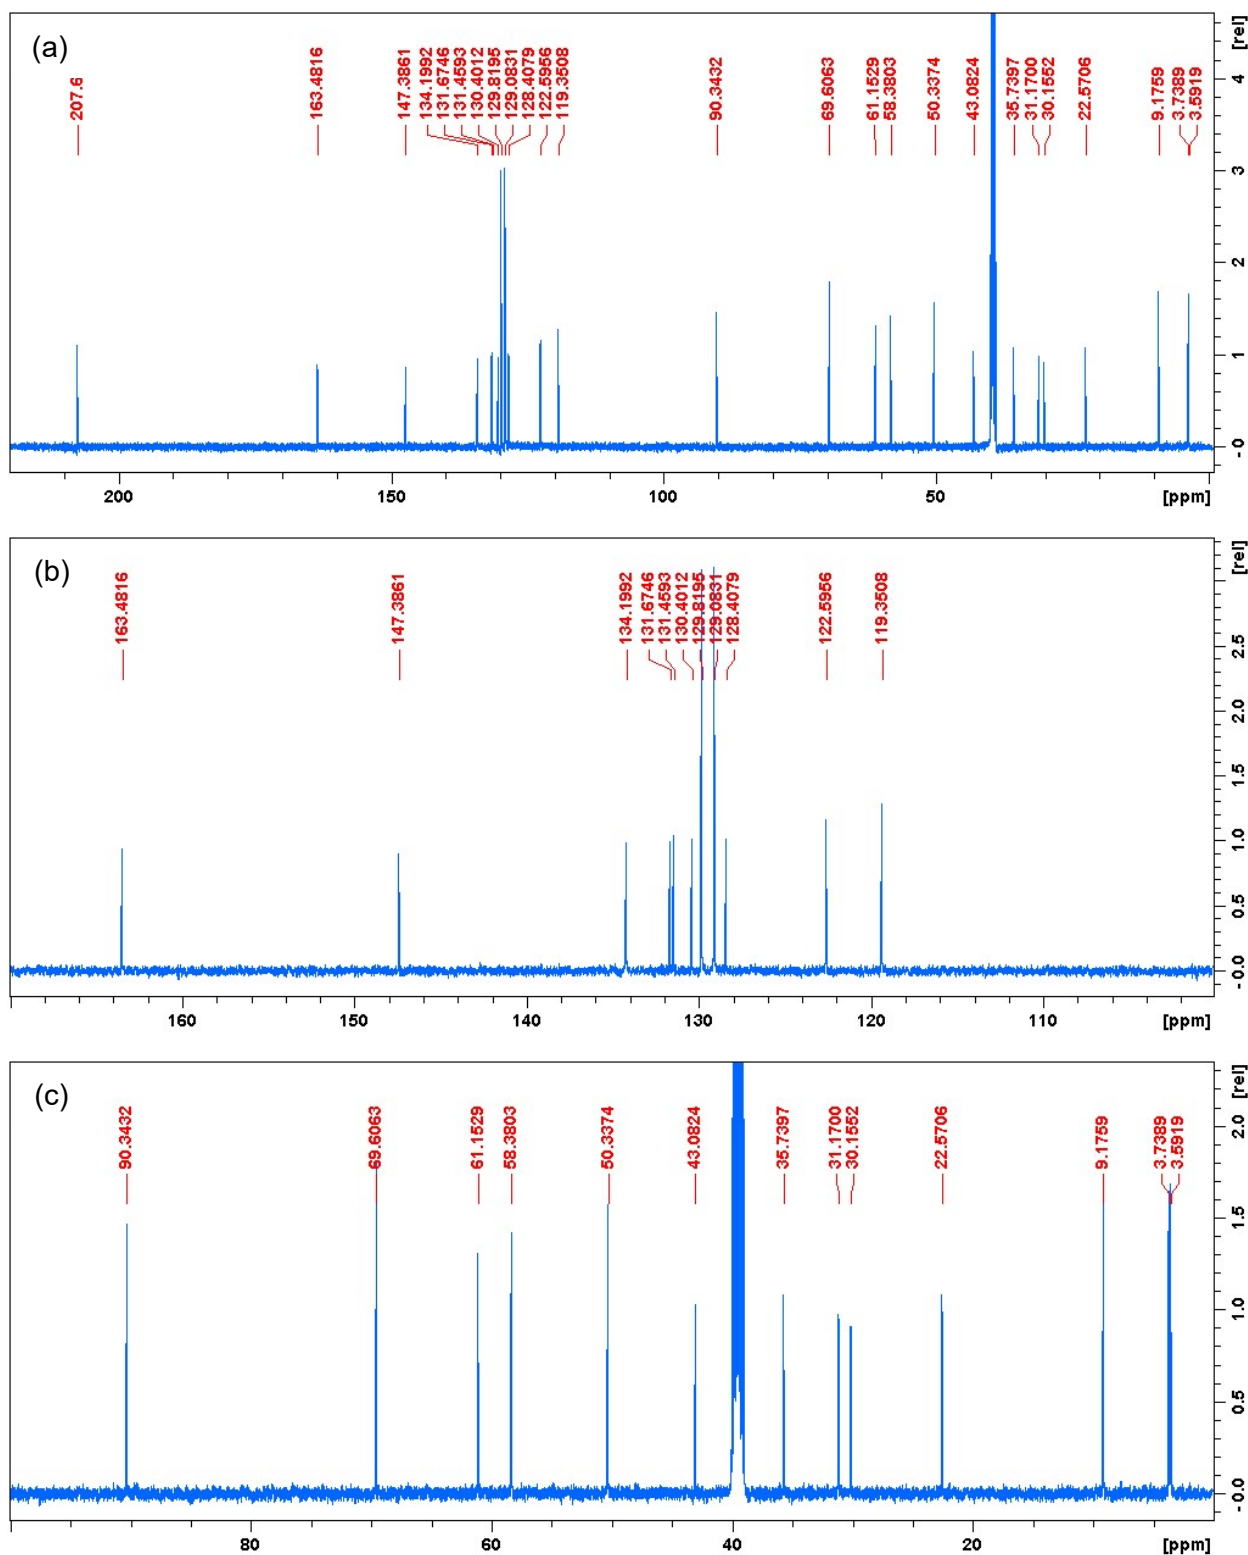

**Figure S12.** (a)  $^{13}\text{C}$  NMR spectrum of 3-benzoyl-naltrexone **8** in  $d_5$ -DMSO (b) Expanded downfield region (c) Expanded upfield region

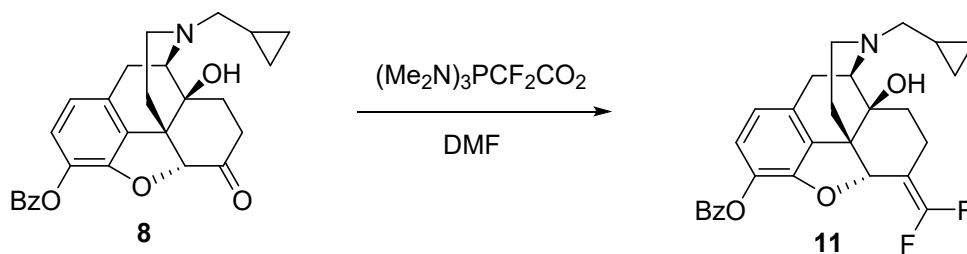

**3-Benzoyl-(6-difluoromethylene)naltrexone (11).** An oven dried microwave vial was charged with ketone **8** (0.305 g, 0.685 mmol) and phosphonium salt **9** (0.528 g, 2.05 mmol). The contents of the vial were purged with N<sub>2</sub> for 20 min, then anhydrous DMF (3.6 mL) was added under N<sub>2</sub>. The slightly turbid reaction mixture was heated at 120 C for 75 min. LC-MS analysis showed the starting material was mostly consumed. The reaction was allowed to cool to ambient temperature then poured into 35 mL of H<sub>2</sub>O. The mixture was extracted with EtOAc (3 x 30 mL). The combined organics were washed with H<sub>2</sub>O (2 x 30 mL) followed by brine. Dried over anhydrous MgSO<sub>4</sub>, filtered, and concentrated. Purification by flash chromatography on SiO<sub>2</sub> (42 g, 0.6% MeOH/CH<sub>2</sub>Cl<sub>2</sub>) afforded 42 mg (13%) of the desired product as a white solid. <sup>1</sup>H NMR (500 MHz, DMSO-*d*<sub>6</sub>): δ 8.13-8.07 (m, 2H), 7.79-7.72 (m, 1H), 7.65-7.58 (m, 2H), 7.01 (d, *J* = 8.2 Hz, 1H), 6.77 (d, *J* = 8.2 Hz, 1H), 5.25-5.21 (m, 1H), 4.83 (s, 1H), 3.16-3.08 (m, 2H), 2.72-2.62 (m, 2H), 2.38 (d, *J* = 6.5 Hz, 2H), 2.36-2.28 (m, 1H), 2.24 (ddd, *J* = 5.2, 12.7, 12.7 Hz, 1H), 2.12 (ddd, *J* = 3.4, 12.0, 12.0 Hz, 1H), 2.03-1.94 (m, 1H), 1.57-1.48 (m, 1H), 1.43 (dd, *J* = 2.2, 12.5 Hz, 1H), 1.25 (ddd, *J* = 6.5, 10.6, 13.7 Hz, 1H), 0.93-0.83 (m, 1H), 0.56-0.44 (m, 2H), 0.20-0.09 (m, 2H). <sup>13</sup>C NMR (125 MHz, DMSO-*d*<sub>6</sub>): δ 163.7, 152.8, (dd, *J* = 286, 293 Hz), 147.3, 134.1, 132.2, 131.7, 131.6, 129.8 (2C), 129.1 (2C), 128.5, 122.5, 119.1, 86.5 (dd, *J* = 11.7, 19.0 Hz), 85.0 (d, 4.7 Hz), 69.3, 61.4, 58.5, 46.6, 43.3, 31.2, 28.4, 22.7, 15.7, 9.1, 3.8, 3.5. <sup>19</sup>F NMR (470 MHz, DMSO-*d*<sub>6</sub>): δ -85.9 (d, *J* = 39.0 Hz), -88.9 (d, *J* = 39.0 Hz). MS (ESI): *m/z* calcd for C<sub>28</sub>H<sub>27</sub>F<sub>2</sub>NO<sub>4</sub> 479.19, found 462.25 [M+H-H<sub>2</sub>O]<sup>+</sup>, 480.25 [M+H]<sup>+</sup>, 502.28 [M+Na]<sup>+</sup>.

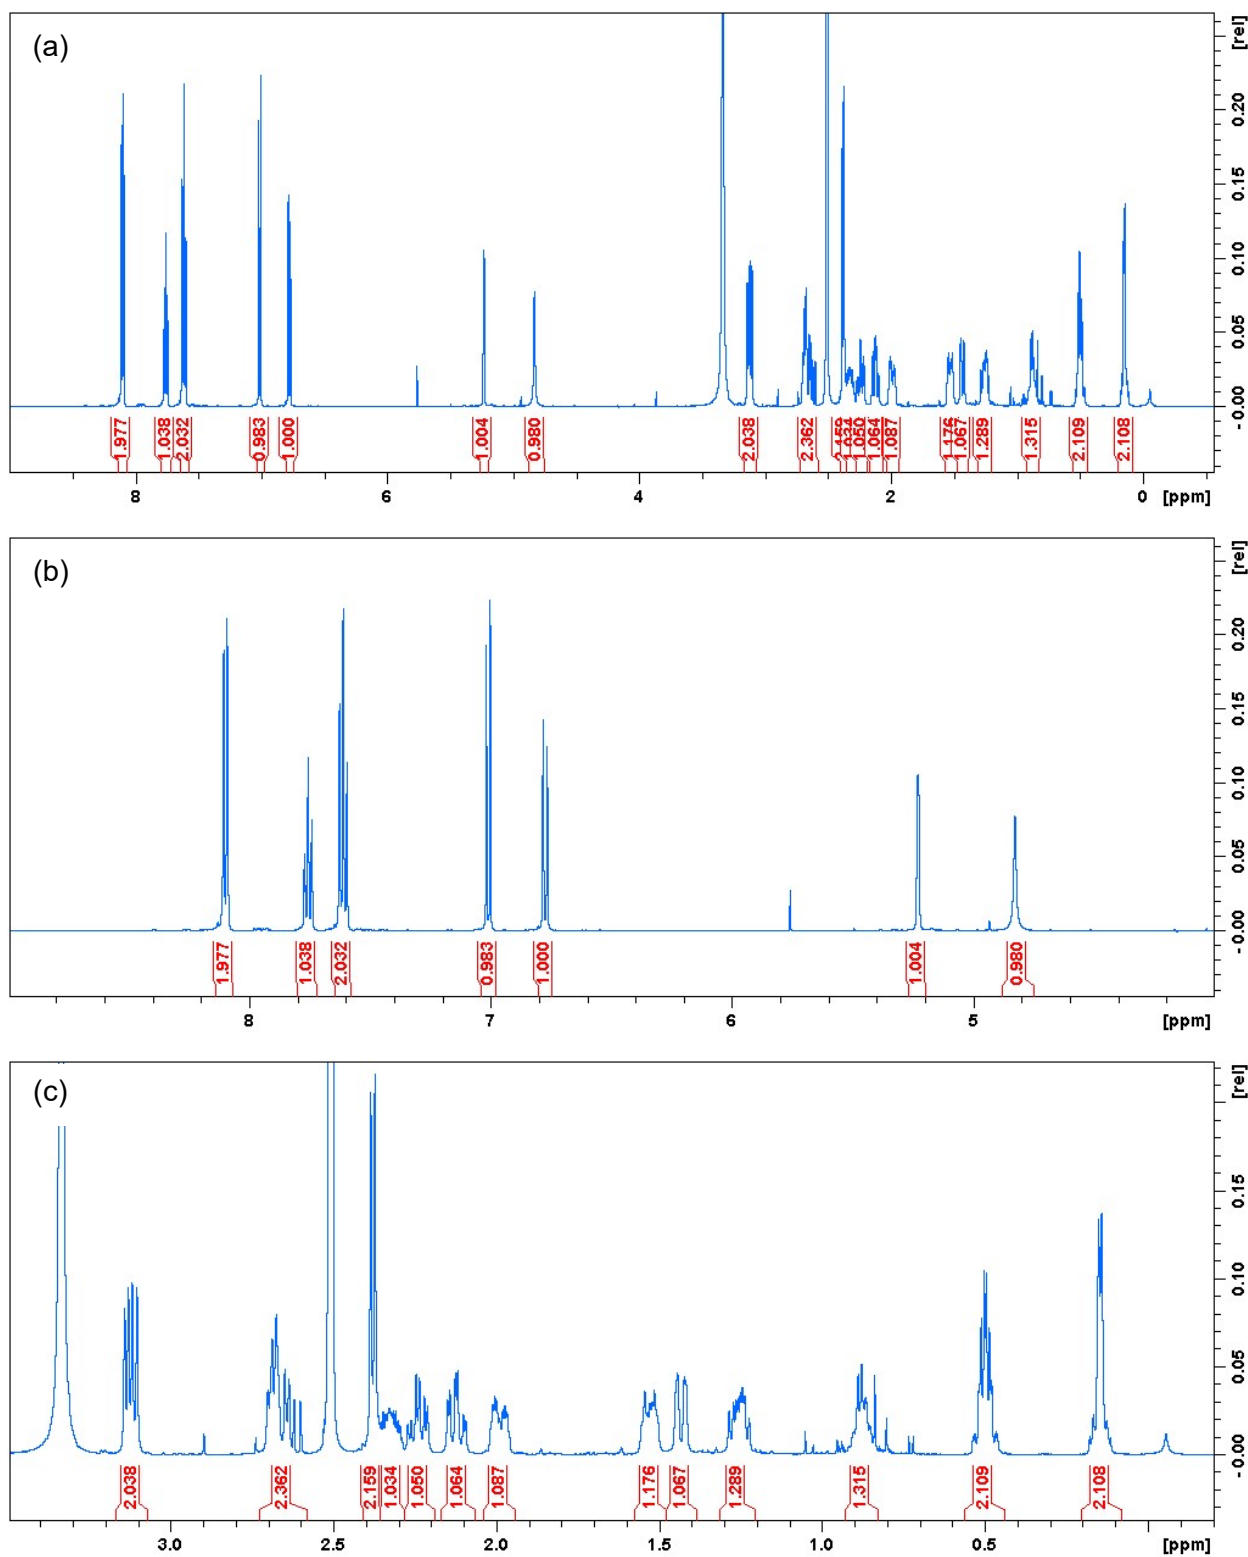

**Figure S13.** (a) <sup>1</sup>H NMR spectrum of 3-benzoyl-(6-difluoromethylene)naltrexone (**11**) in *d*<sub>6</sub>-DMSO (b) Expanded downfield region (c) Expanded upfield region

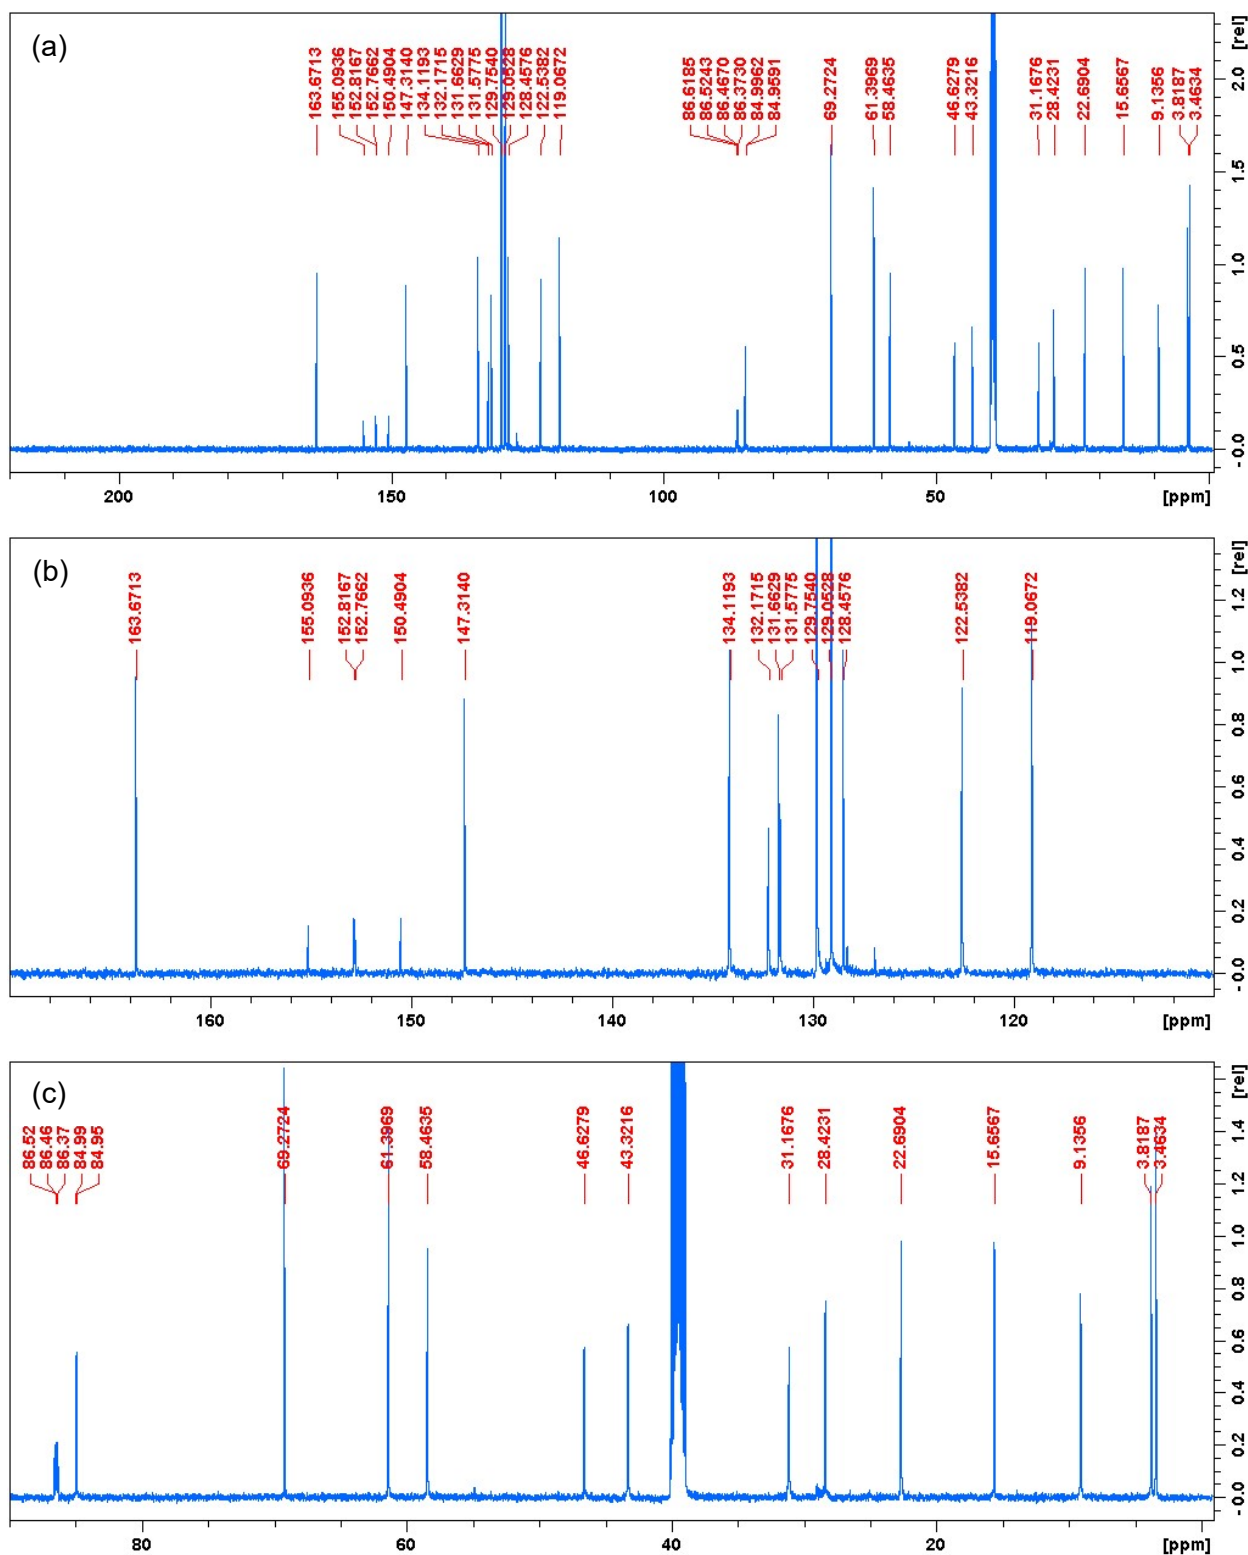

**Figure S14.** (a)  $^{13}\text{C}$  NMR spectrum of 3-benzoyl-(6-difluoromethylene)naltrexone (**11**) in  $d_6$ -DMSO (b) Expanded downfield region (c) Expanded upfield region

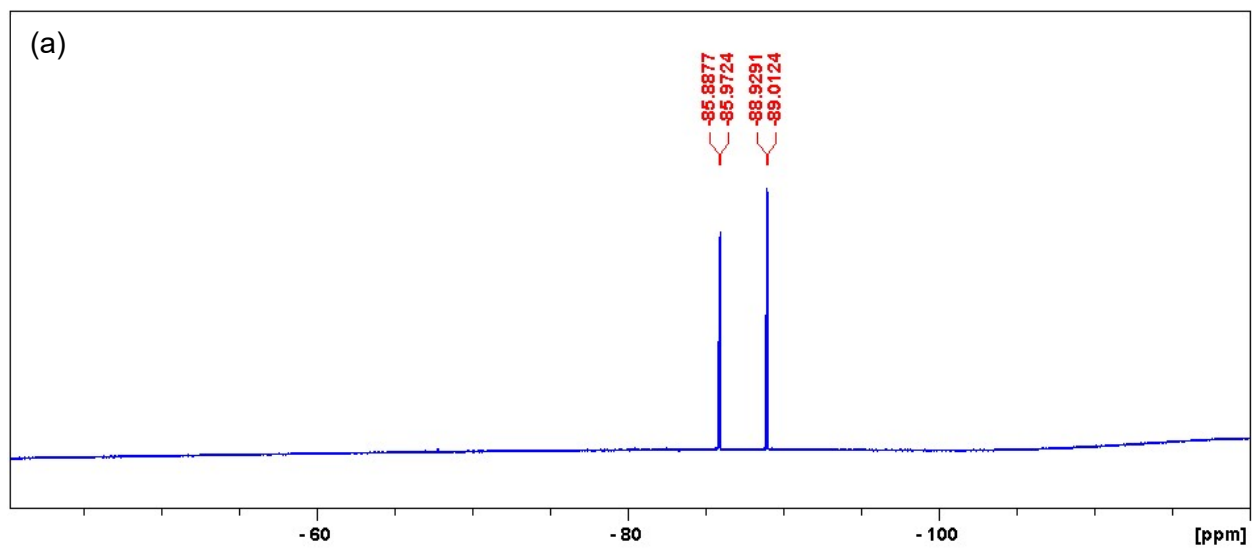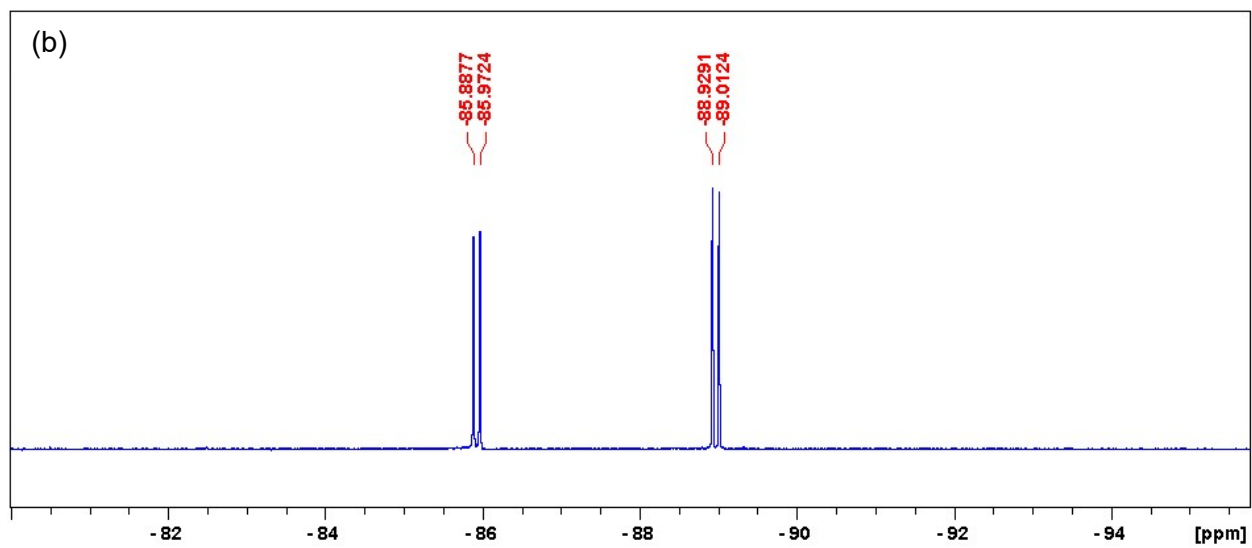

**Figure S15.** (a)  $^{19}\text{F}$  NMR spectrum of 3-benzoyl-(6-difluoromethylene)naltrexone (**11**) in  $d_6$ -DMSO (b) Expansion for clarity.

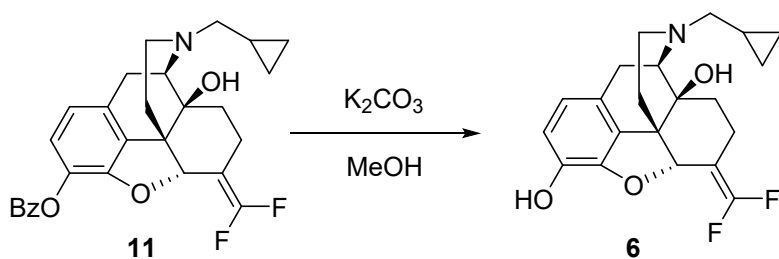

**6-Difluoromethylene-naltrexone (6).** To a white suspension of benzoate **11** (42 mg, 0.088 mmol) in MeOH (2 mL) was added  $\text{K}_2\text{CO}_3$  (18 mg, 0.131 mmol) in one portion. The mixture was maintained at ambient temperature for 2.5 h. LC-MS analysis showed the reaction was complete. Diluted with 30 mL of  $\text{CH}_2\text{Cl}_2$  and washed with saturated aqueous  $\text{NaHCO}_3$  (15 mL). The aqueous layer was further extracted with  $\text{CH}_2\text{Cl}_2$  (10 mL). The combined organics were washed with brine, dried over anhydrous  $\text{MgSO}_4$ , filtered, and concentrated. Purification by flash chromatography on  $\text{SiO}_2$  (12 g, 0.8% MeOH/ $\text{CH}_2\text{Cl}_2$  then 2% MeOH/ $\text{CH}_2\text{Cl}_2$ ) afforded 22 mg (67%) of the desired product as a white solid.  $^1\text{H}$  NMR (500 MHz,  $\text{DMSO}-d_6$ ):  $\delta$  9.02 (s, 1H), 6.58 (d,  $J = 8.0$  Hz, 1H), 6.49 (d,  $J = 8.0$  Hz, 1H), 5.08 (d,  $J = 2.4$  Hz, 1H), 4.75 (s, 1H), 3.03 (d,  $J = 6.1$  Hz, 1H), 2.98 (d,  $J = 18.5$  Hz, 1H), 2.62 (dd,  $J = 3.9, 11.3$  Hz, 1H), 2.55-2.50 (m, 1H), 2.36-2.26 (m, 3H), 2.17 (ddd,  $J = 5.0, 12.6, 12.6$  Hz, 1H), 2.09 (ddd,  $J = 3.4, 12.2, 12.2$  Hz, 1H), 1.99-1.91 (m, 1H), 1.50-1.41 (m, 1H), 1.40-1.33 (m, 1H), 1.21 (ddd,  $J = 6.5, 10.7, 13.4$  Hz, 1H), 0.90-0.79 (m, 1H), 0.52-0.42 (m, 2H), 0.16-0.07 (m, 2H).  $^{13}\text{C}$  NMR (125 MHz,  $\text{DMSO}-d_6$ ):  $\delta$  152.9 (dd, 286, 292 Hz), 143.3, 139.1, 130.5, 124.1, 118.6, 117.1, 86.9 (dd,  $J = 12.2, 18.0$  Hz), 83.3 (d,  $J = 4.7$  Hz), 69.3, 61.6, 58.5, 46.4, 43.4, 31.5, 28.2, 22.2, 15.8, 9.2, 3.8, 3.5.  $^{19}\text{F}$  NMR (470 MHz,  $\text{DMSO}-d_6$ ):  $\delta$  -86.3 (d,  $J = 39.8$  Hz), -89.3 (d,  $J = 39.8$  Hz). MS (ESI):  $m/z$  calcd for  $\text{C}_{21}\text{H}_{23}\text{F}_2\text{NO}_3$  375.16, found 358.04  $[\text{M}+\text{H}-\text{H}_2\text{O}]^+$ , 376.07  $[\text{M}+\text{H}]^+$ .

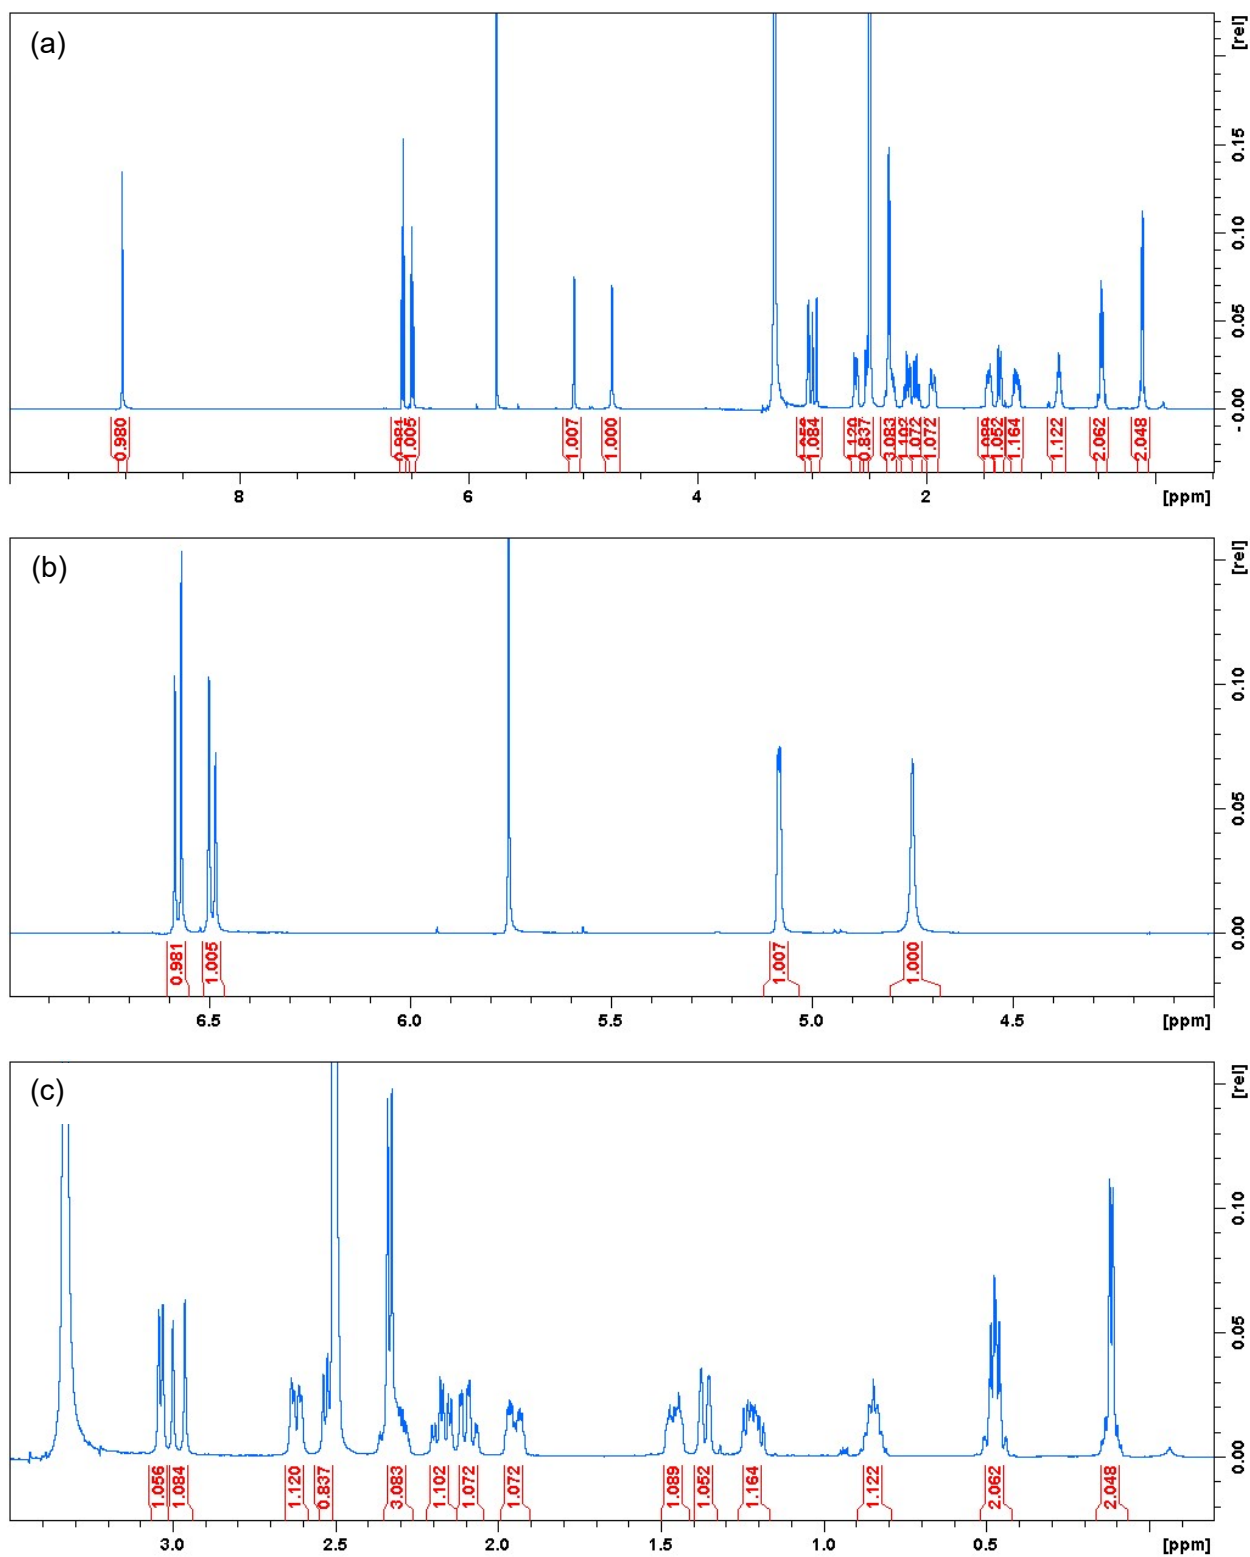

**Figure S16.** (a) <sup>1</sup>H NMR spectrum of (6-difluoromethylene)naltrexone (**6**) in *d*<sub>6</sub>-DMSO (b) Expanded downfield region (c) Expanded upfield region

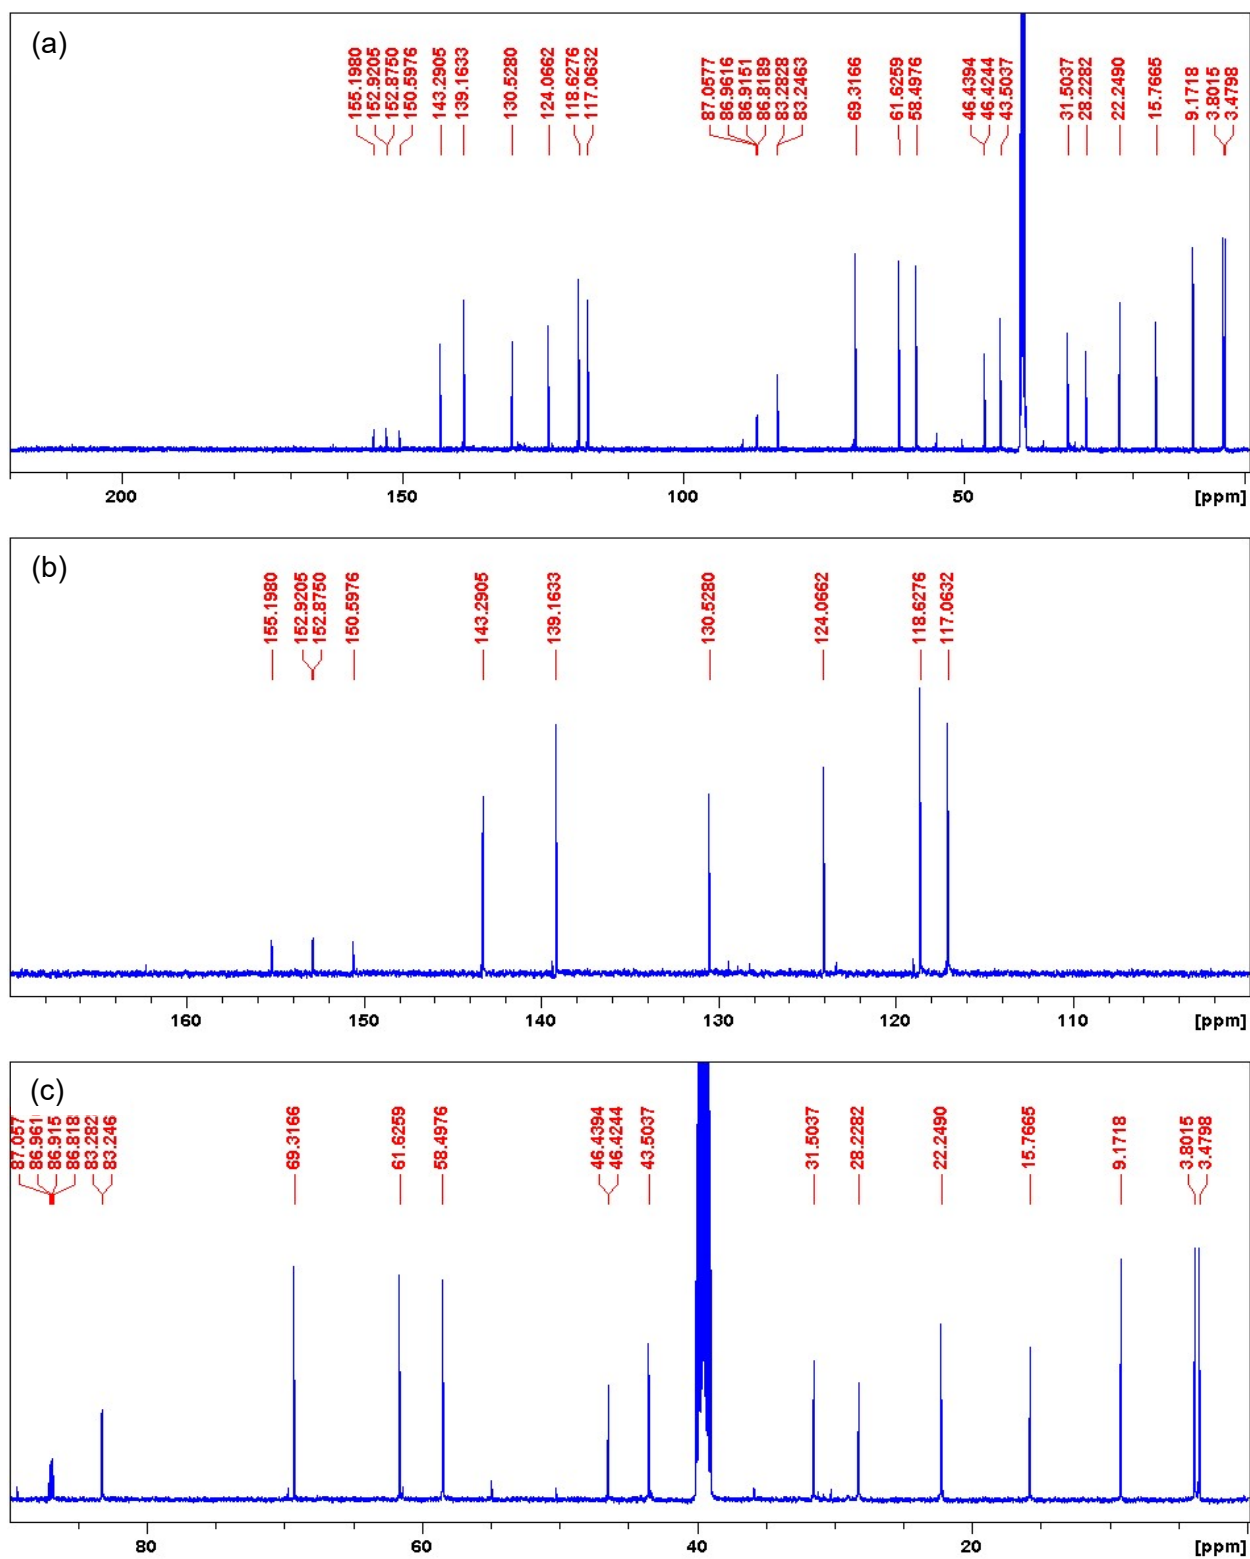

**Figure S17.** (a) <sup>13</sup>C NMR spectrum of (6-difluoromethylene)naltrexone (**6**) in *d*<sub>6</sub>-DMSO (b) Expanded downfield region (c) Expanded upfield region



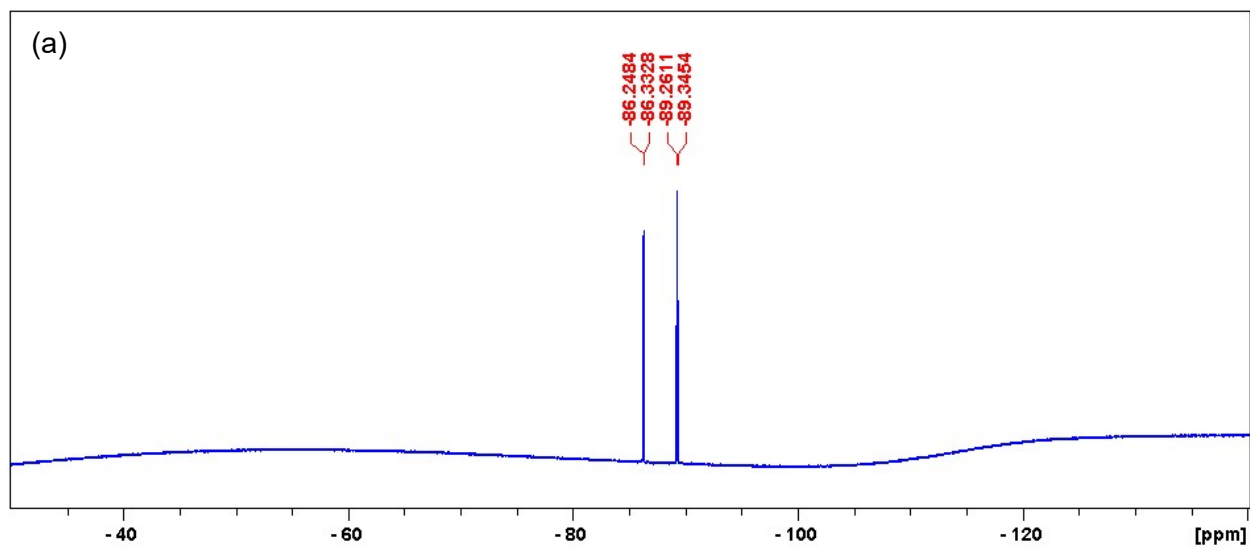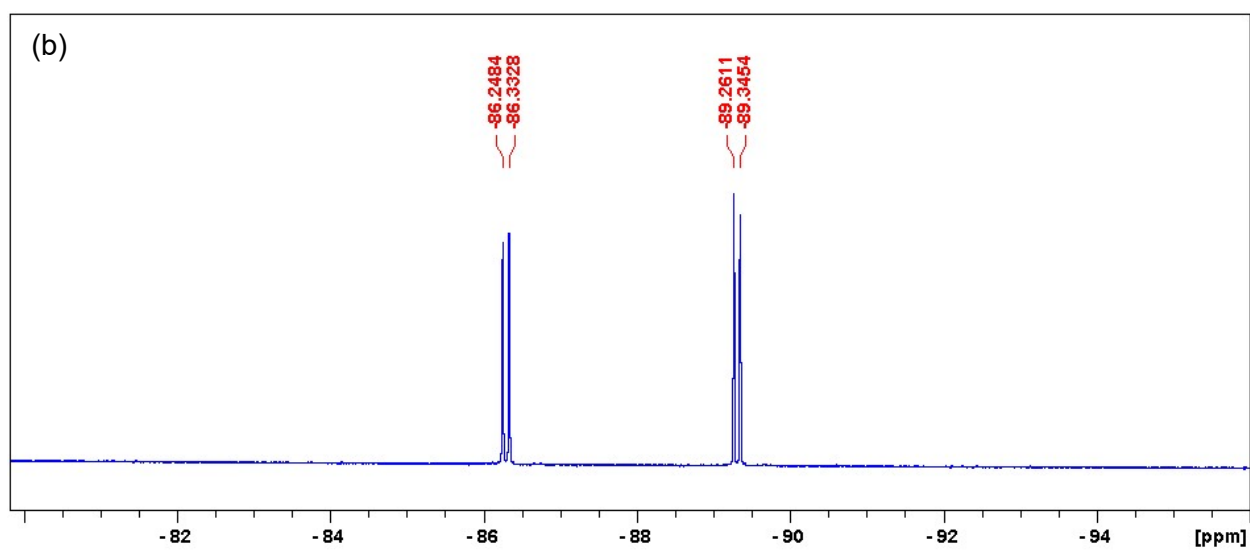

**Figure S18.** (a)  $^{19}\text{F}$  NMR spectrum of (6-difluoromethylene)naltrexone (**6**) in  $d_6$ -DMSO (b) Expansion for clarity.

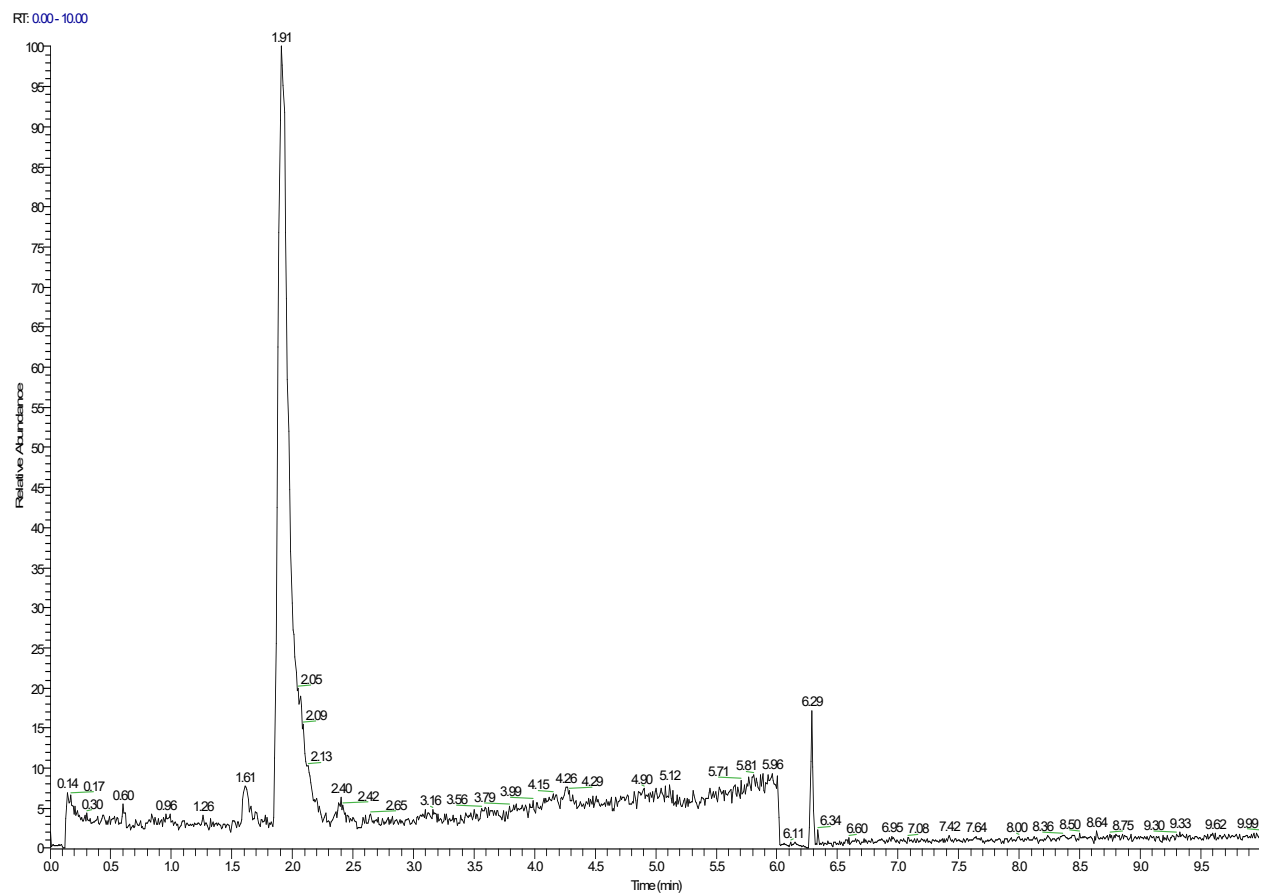

**Figure S19.** LC-MS chromatogram of (6-difluoromethylene)naltrexone (**6**).

AIK\_9\_5C #217 RT: 1.91 A4.1 NL: 6.09E6  
T: +cESI QIMS [150.000-900.000]

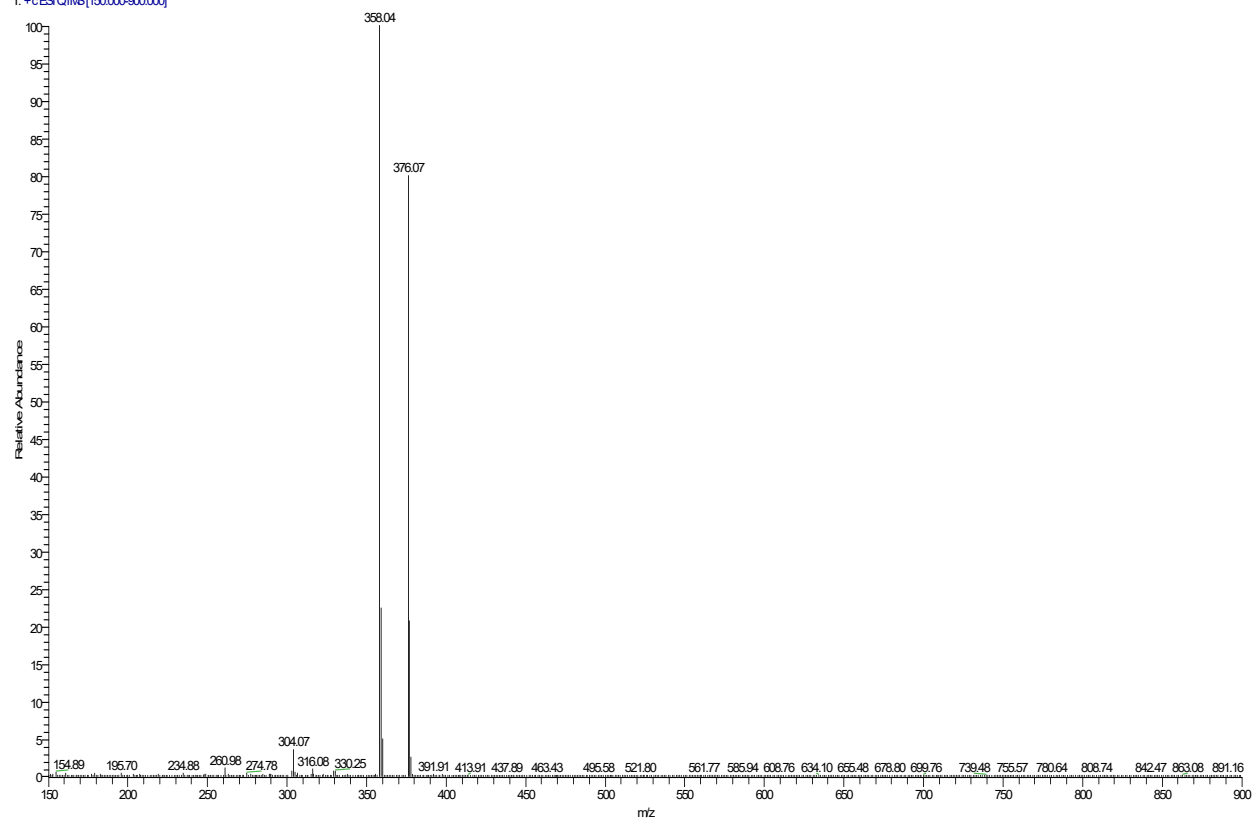

**Figure S20.** LC-MS mass spectrum of (6-difluoromethylene)naltrexone (**6**).
